1           **Rv3722c governs aspartate-dependent nitrogen metabolism in *Mycobacterium tuberculosis***

2

3           Robert Jansen<sup>1</sup>, Lungelo Mandyoli<sup>2</sup>, Ryan Hughes<sup>2</sup>, Shoko Wakabayashi<sup>3</sup>, Jessica Pinkham<sup>3</sup>, Bruna  
4           Selbach<sup>1</sup>, Kristine Guinn<sup>3</sup>, Eric Rubin<sup>3</sup>, James Sacchettini<sup>2\*</sup>, Kyu Rhee<sup>1,4\*</sup>

5

6           **Affiliations**

7           1. Division of Infectious Diseases, Department of Medicine, Weill Cornell Medical College, New  
8           York, New York 10065, USA.

9           2. Department of Biochemistry and Biophysics, Texas A&M University, College Station, TX.

10          3. Department of Immunology and Infectious Diseases, Harvard T. H. Chan School of Public Health,  
11          Boston, Massachusetts, USA.

12          4. Department of Microbiology & Immunology, Weill Cornell Medical College, New York, New York  
13          10065, USA.

14

15          \* Corresponding authors

## 16 **Abstract**

17 Organisms are defined by their genomes, yet many distinguishing features of a given organism are  
18 encoded by genes that are functionally unannotated. *Mycobacterium tuberculosis* (*Mtb*), the leading  
19 cause of death due to a single microbe, co-evolved with humans as its only known natural reservoir, yet  
20 the factors mediating *Mtb*'s pathogenicity remain incompletely defined. *rv3722c* is a gene of unknown  
21 function predicted to encode a pyridoxal phosphate binding protein and to be essential for *in vitro*  
22 growth of *Mtb*. Using metabolomic, genetic and structural approaches, we show that Rv3722c is the  
23 primary aspartate aminotransferase of *Mtb* and mediates an essential but underrecognized role in  
24 metabolism: nitrogen distribution. Together with the attenuation of Rv3722c-deficient *Mtb* in  
25 macrophages and mice, these results identify aspartate biosynthesis and nitrogen distribution as  
26 potential species-selective drug targets in *Mtb*.

## 27 Introduction

28 The accumulation of sequence data is outpacing the ability to annotate its information content<sup>1-3</sup>. As  
29 many as half of all predicted coding sequences are estimated to be unannotated or misannotated or to  
30 encode additional activities beyond their predicted functions<sup>1,4</sup>. Conversely, approximately one third of  
31 all detected enzymatic activities lack an associated coding sequence<sup>5</sup>. For microbial pathogens, such  
32 gaps have restricted access to what may be the most specific and actionable features of their  
33 physiology.

34 *Mycobacterium tuberculosis* (*Mtb*) is the causative agent of tuberculosis (TB) and the leading cause of  
35 death due to an infectious agent<sup>6</sup>. Curative chemotherapies for TB were first developed over 50 years  
36 ago but are only recently beginning to change and currently number among the longest, most complex  
37 and toxic treatments for a bacterial infection. Together, these shortcomings have fostered rates of  
38 treatment non-compliance and default that help fuel the pandemic and promote the emergence of drug  
39 resistance. Shorter, simpler chemotherapies are urgently needed.

40 *rv3722c* is an *Mtb* gene of unknown function, predicted by transposon mutagenesis to be essential for *in*  
41 *vitro* growth<sup>7,8</sup>. Bio-informatic analyses predict that *rv3722c* encodes a pyridoxal phosphate (PLP)  
42 binding domain. Consistent with that prediction, Rv3722c is annotated as an aminotransferase<sup>9,10</sup>, but it  
43 is also annotated as a member of the GntR family of transcription factors<sup>11,12</sup>, while experimental  
44 studies have implicated Rv3722c as a serine hydrolase<sup>13</sup> and a secreted protein<sup>14,15</sup>.

45 Growing evidence has implicated carbon metabolism as a determinant of *Mtb* pathogenicity<sup>16</sup>. However,  
46 recent work has begun to implicate a similarly important role for nitrogen uptake and assimilation<sup>17-19</sup>.  
47 Here, we demonstrate that Rv3722c encodes the primary aspartate aminotransferase (AspAT) in *Mtb*,  
48 non-redundantly catalyzes the specific biosynthesis of Asp *in vitro* and is essential for axenic growth and

49 survival of *Mtb* in macrophages and in mice. We further show that this essentiality is due, in part, to a  
50 non-redundant role of Asp in the metabolic distribution of assimilated nitrogen. These findings identify  
51 Rv3722c as an essential metabolic mediator of Asp biosynthesis and Asp-dependent nitrogen  
52 metabolism as an essential determinant of *Mtb* growth and virulence.

## 53 **Results**

54 *Rv3722c is conditionally essential in vitro*

55 We first sought to confirm the predicted essentiality of Rv3722c. We constructed an *Mtb* strain in which  
56 expression of Rv3722c is regulated by its native promoter, but protein stability is controlled by a  
57 tetracycline-repressible protein degradation system (Rv3722c-TetON)<sup>20,21</sup>. An isogenic strain lacking a  
58 functional protein degradation system (Rv3722c-Control) served as a control. As predicted, omission of  
59 anhydrotetracycline (ATC) resulted in depletion of Rv3722c protein and attenuation of *Mtb* growth in  
60 Glu-based Middlebrook 7H9 medium (Fig 1A-B). This growth defect could be overcome by culturing  
61 Rv3722c-TetON in the same medium supplemented with casein hydrolysate, which contains a complex  
62 mixture of amino acids and small peptides (Fig 1C), and mitigated by culture on Middlebrook 7H10 agar  
63 (Fig 1D). This conditional rescue made it possible to deplete Rv3722c to levels below the limit of  
64 detection (Fig 1E) before a subsequent experimental challenge. Such pre-depletion completely  
65 prevented subsequent growth in unsupplemented 7H9 (Fig 1F). Rv3722c could also be depleted below  
66 the limit of detection without impairing growth by culturing the cells in an Asn-based minimal medium  
67 (Sauton's) (Fig S1).

**Figure 1. Rv3722c is conditionally essential *in vitro***

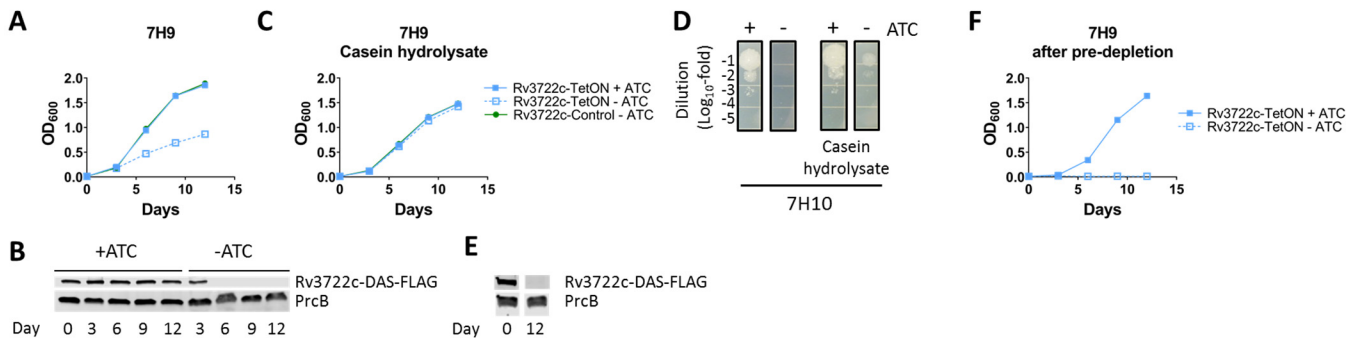

68

69 **Figure 1.** Rv3722c is conditionally essential *in vitro*. **A)** Growth curve of Rv3722c-proficient and –  
 70 deficient *Mtb* in 7H9 culture media. Rv3722c-TetOn and Rv3722c-control were cultured in Middlebrook  
 71 7H9 culture media with or without 500 ng/mL anhydrotetracycline (ATC). Bacterial growth was  
 72 monitored by optical density at 600 nm. **B)** Western blot showing the depletion of Rv3722c 7H9 culture  
 73 media. Rv3722c-TetON was cultured in 7H9 with or without ATC for 12 days (corresponding to A).  
 74 Protein lysates were analyzed by Western blotting, using an  $\alpha$ -FLAG antibody. The proteasome subunit  $\beta$   
 75 (PrcB) was used as loading control. **C)** Growth curve of Rv3722c-proficient and –deficient *Mtb*  
 76 supplemented with casein hydrolysate. As A, but using 7H9 supplemented with 1% casein hydrolysate.  
 77 **D)** Spot assay of Rv3722c-proficient and –deficient *Mtb* on solid growth media. A serially diluted  
 78 Rv3722c-TetON culture (OD 0.1) was spotted onto Middlebrook 7H10 agar with or without 1% casein  
 79 hydrolysate, in the presence or absence of ATC, and cultures for 2 weeks. **E)** Western blot showing  
 80 depletion of Rv3722c. As B, but in 7H9 supplemented with 1% casein hydrolysate. **F)** Growth curve of  
 81 Rv3722c-proficient and –pre-depleted *Mtb* in 7H9 growth media. Rv3722c-TetOn in 7H9 with or without  
 82 ATC, after pre-depletion of Rv3722c in 7H9 with 1% casein hydrolysate without ATC. For all growth  
 83 curves, data are represented as mean  $\pm$  SD of three experimental replicates (n=3) representative of at  
 84 least two independent experiments. See also Fig S1.

85 *Rv3722c* is essential for infection

86 We next tested the essentiality of *Rv3722c* *in vivo* by first infecting mouse bone marrow-derived  
87 macrophages with *Rv3722c*-sufficient and *Rv3722c*-pre-depleted *Mtb*. Growth of *Rv3722c*-deficient *Mtb*  
88 was severely compromised in both resting and interferon- $\gamma$ -activated macrophages (Fig 2A). Testing in  
89 an aerosol infection model of TB in mice similarly revealed a striking attenuation of *Rv3722c*-deficient  
90 *Mtb* in lungs, as reported by a lack of growth (Fig 2B) or their rapid and complete replacement by escape  
91 mutants that were no longer ATC-responsive (Fig S2).

**Figure 2. *Rv3722c* is required for virulence in macrophages and mice**

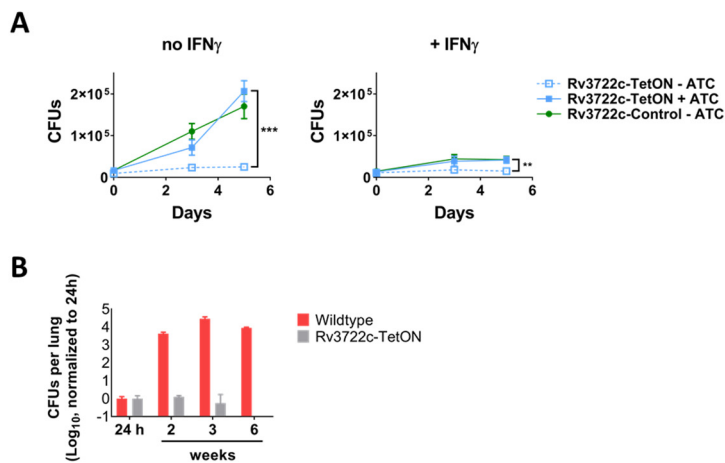

92

93 **Figure 2.** *Rv3722c* is required for virulence in macrophages and mice. **A)** Timecourse of macrophage  
94 infection. Primary murine bone marrow-derived macrophages were treated with control or interferon  $\gamma$   
95 (IFN $\gamma$ ) for activation, followed by infection with *Rv3722c*-control and *Rv3722c*-TetON precultured in  
96 7H9+casein hydrolysate with or without ATC to pre-deplete *Rv3722c* (multiplicity of infection of 1). The  
97 number of colony-forming units (CFU's) were assessed by plating serial dilutions on 7H10 solid media  
98 supplemented with casein hydrolysate and ATC. Data are presented as mean +/- SD of three  
99 experimental replicates (n=3) representative of two independent experiments; \*\*: p< 0.01, \*\*\*:p<0.001  
100 using unpaired Student's *t*-test. **B)** Timecourse of mouse infection. Mice were infected with aerosolized  
101 wildtype *Mtb* and *Rv3722c*-TetON pre-cultured in Sauton's without ATC to generate *Rv3722c*-deficient

102 *Mtb*. After infection, mice were fed chow without doxycycline. The number of CFU's were assessed by  
103 plating serial dilutions on 7H10 solid media with and without ATC to determine the number of non-ATC-  
104 responsive mutants. Because the Rv3722c-TetON was lower than that of wildtype, the number of CFUs  
105 were normalized to the number of CFU's detected 24h. No non ATC-dependent Rv3722c-TetON mutants  
106 were detected. Data are represented as mean +/- SD (n=3-5). A similar experiment is shown in Fig S2.

107

#### 108 *Rv3722c functions as an aminotransferase*

109 Based on bio-informatic evidence implicating Rv3722c as a PLP-dependent protein, we assayed purified  
110 recombinant Rv3722c for catalytic activity using activity-based metabolomic profiling (ABMP). ABMP is a  
111 biochemically unbiased method developed to 'de-orphan' unannotated metabolic enzymes that consists  
112 of incubation of a protein of interest with a highly concentrated homologous metabolite extract and  
113 monitoring for time- and protein-dependent changes indicative of catalysis by untargeted high-  
114 resolution mass spectrometry<sup>22-26</sup>. ABMP with Rv3722c identified several putative product features  
115 (fragments, adducts, dimers and isotopes) that could all be related to a metabolite with m/z 144.03 [M-  
116 H]<sup>-</sup> (Fig 3A). This metabolite was formed in a time- and Rv3722c-dependent fashion (Fig 3B), and  
117 identified by mass spectral fragmentation as ketoglutaramate (keto-Gln), the ketoacid of Gln (Fig 3C).

118

119 Aminotransferases are the only known enzymatic source of keto-Gln<sup>27</sup>. We therefore tested Rv3722c for  
120 aminotransferase activity. Because aminotransferases catalyze the reversible reaction between amino  
121 acids and keto acids, we tested the ability of Rv3722c to generate <sup>15</sup>N-labeled amino acids following  
122 incubation with amine-<sup>15</sup>N-Gln and with the same unlabeled concentrated mycobacterial metabolite  
123 extract. This approach demonstrated a clear time- and protein-dependent formation of <sup>15</sup>N-Asp and <sup>15</sup>N-  
124 Glu, with matching depletion of αKG (Fig S3A). This approach conversely demonstrated depletion of Asp,

125 His, Gln and Trp upon addition of  $\alpha$ -ketoglutarate ( $\alpha$ KG) (Fig S3B). These data thus annotate Rv3722c, at  
 126 a class level, as an aminotransferase.  
 127

**Figure 3. Rv3722c functions as an aspartate aminotransferase**

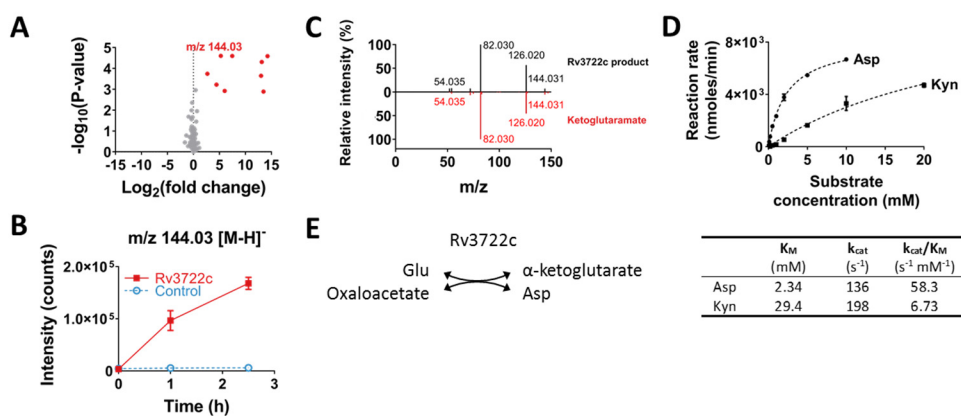

128  
 129 **Figure 3.** Rv3722c functions as an aspartate aminotransferase. **A)** Volcano-plot of activity-based  
 130 metabolite profiling with purified recombinant Rv3722c. Purified recombinant Rv3722c (10  $\mu$ M) was  
 131 incubated with a mycobacterial metabolite extract for 0 h or 2.5 h at 37  $^{\circ}$ C and analyzed using  
 132 untargeted LC-MS. Each dot represents a feature (a chromatographic peak with a specific m/z) in the  
 133 negative ionization mode; red dots represent features related to the feature with m/z 144.03 [M-H]<sup>-</sup>  
 134 (n=3). **B)** Timecourse of Rv3722c-dependent formation of m/z 144.03. Same as A, but data shown for 0,  
 135 1 and 2,5 h, in presence of active Rv3722c and heat-inactivated Rv3722c control (10 min 95  $^{\circ}$ C) (mean  
 136 +/- SD of three experimental replicates (n=3) representative of at least two independent experiments).  
 137 **C)** MS fragmentation spectra of the Rv3722c reaction product with m/z 144.03 and in-house synthesized  
 138 ketoglutaramate at a collision energy of 10. **D)** Steady-state enzyme kinetics of Rv3722c. Purified  
 139 recombinant Rv3722c (0.01  $\mu$ M) was incubated with 10 mM  $\alpha$ -ketoglutarate and increasing  
 140 concentrations of amino donors at 37  $^{\circ}$ C. Glu formation was measured by RapidFire mass spectrometry  
 141 and used to determine initial reaction rates. Data were fitted to Michaelis-Menten kinetics using



142 Graphpad Prism software and are represented as mean +/- SD (n=3) (Kyn: Kynurenine). **E**

143 Aminotransferase reaction catalyzed by Rv3722c. See also Fig S3 and S4.

144

145 *Rv3722c functions as an aspartate aminotransferase*

146 To define the substrate specificity of Rv3722c, we next incubated Rv3722c with a panel of 26 amino

147 acids, using  $\alpha$ KG, pyruvate and oxaloacetate as potential amino acceptors. Oxaloacetate and  $\alpha$ KG, but

148 not pyruvate, served as amino acceptors, while kynurenine (Kyn), Asp and Glu served as the best amino

149 donors (Fig S4A). In contrast, His, Cys, Asn, and Gln exhibited minimal activity (Fig S4A-B). Formal kinetic

150 studies identified Asp as the preferred substrate and Kyn as a weaker alternative (Fig 3D). His, Cys, Asn

151 and Gln exhibited extremely low rates of turnover consistent with kinetic side reactivity (Fig S4C). These

152 results thus annotate Rv3722c as an aspartate aminotransferase (AspAT; Fig 3E), with a weak, but

153 significant, side-activity towards Kyn, as observed in AspATs from other species<sup>28,29</sup>.

154

155 *The sequence of Rv3722c differs from classical aspartate aminotransferases*

156 Aminotransferases are assigned to five taxonomic classes based on the sequence of their PLP binding

157 domain<sup>30,31</sup>. AspAT's belong to class I, which has classically been subdivided into types Ia and Ib<sup>32</sup>.

158 Rv3722c, however, belongs to a recently described and structurally distinct subclass of AspATs,

159 designated type Ic<sup>32</sup>, that correspond to the poorly characterized Pfam family PF12897<sup>9</sup>. Members of

160 this family are absent in humans and almost exclusively present in bacteria, where they have a limited

161 species distribution (Fig S5)<sup>9</sup>.

162

163 *Rv3722c has a type Ic fold*

164 To elucidate the structural basis of the substrate recognition by Rv3722c, we solved crystal structures of

165 the enzyme pre-incubated with Glu or Kyn at a resolution of 2.6 Å and 2.15 Å, respectively (Table S1).

166 The overall fold of Rv3722c is similar to that of other members of the recently described type Ic  
167 subgroup of PLP-binding proteins<sup>32</sup> (Fig S6). Each monomer consists of a core domain (Leu53-Asp305)  
168 that folds into a nearly perfect  $\alpha/\beta$  motif comprised of a central eight-stranded (predominantly  
169 antiparallel)  $\beta$ -sheet surrounded by eight  $\alpha$ -helices. Rv3722c also encodes an N-terminal auxiliary  
170 domain (Pro8-Ser52 and Gly303-Leu423) that stacks and forms an elongated segment on top of the core  
171 domain and consists of five  $\alpha$ -helices and an antiparallel  $\beta$ -sheet.

172

173 *Rv3722c binds dicarboxylic acid and aromatic substrates*

174 The structure of Rv3722c pre-incubated with Glu demonstrated clear electron density of the amino acid  
175 in the active site located at the convergence of the auxiliary and core domain (Fig S7). Glu is engaged by  
176 both polar and non-polar interactions (Fig 4A). Canonical AspATs coordinate the side chain carboxylate  
177 group of dicarboxylic substrates through a conserved active site Arg (or Lys)<sup>33,34</sup>. Our structure shows  
178 that Rv3722c also forms a salt bridge with side chain carboxylate group of Glu, but using a structurally  
179 non-homologous Arg residue at position 141.

**Figure 4. Rv3722c structure with bound ligands**

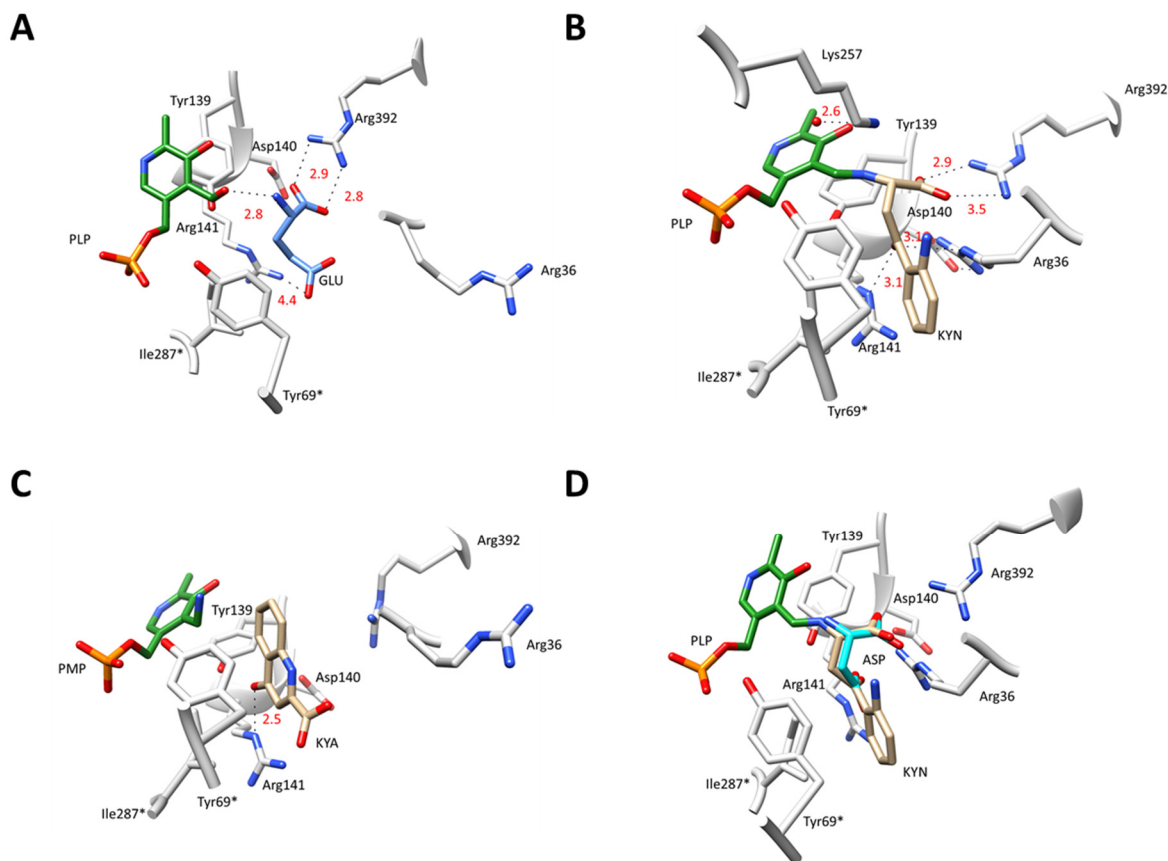

180

181 **Figure 4.** Rv3722c structure with bound ligands. **A)** Stick representation of Rv3722c in complex with  
182 glutamate (GLU; blue). **B)** Rv3722c in complex with kynurenine (KYN; tan). **C)** Rv3722c in complex with  
183 kynurenic acid (KYNA; tan). **D)** Kyn mimics Asp in the active site pocket of Rv3722c. Modelling aspartic  
184 acid (ASP; cyan) into the electron density of the aliphatic chain of KYN (tan), reveals a structural mimicry  
185 that is potentially behind the capability of Rv3722c to use KYN as an amino donor. For all figures, active  
186 site residues are in light grey and PLP in green. Ligand interactions are shown as dashed lines and  
187 distances are in angstroms. (\* denotes a residue from the second monomer). See also Fig S6-S10.

188 In the asymmetric unit of Rv3722c pre-incubated with Kyn, we observed that the chains were bound to  
189 either the external aldimine intermediate PLP-kynurenine (PLP-Kyn), or the final keto acid product  
190 kynurenic acid (Kyna) (Fig 4B, 4C, S8A and S9). In the unbound form of Rv3722c, the positively charged  
191 guanidinium side chain of Arg36 points outward and lies above the entrance of the active site pocket  
192 (Fig S10). Upon binding Kyn, however, we observed that the side chain of this residue is positioned more  
193 inward (by  $\sim 12$  Å measured from the C $\zeta$  atom) and interacts with Kyn (Fig 4B, S8B and S10). Upon  
194 moving inwards, Arg36 forms a hydrogen bond salt bridge with Asp140. This ligand-induced  
195 conformational change is reminiscent of the so called “arginine switch” observed in type Ia AspATs,  
196 although here the Arg residue moves towards the substrate rather than away<sup>35</sup>. In the first half reaction  
197 of transamination, a water molecule hydrolyses the ketimine intermediate releasing a keto acid of the  
198 amino donor and generating PMP<sup>40</sup>. In our structure, we observed a sharp peak of a water molecule in  
199 close proximity to both the active site Lys257 and the PLP-KYN intermediate (Figure S8A). We speculate  
200 that this is the same water molecule responsible for the generation of the keto acid Kyna, from the PLP-  
201 KYN intermediate.

202 On the other hand, we observed that the product Kyna exhibits a different pose relative to its precursor  
203 such that, when compared to Kyn, the carboxylate group of Kyna is rotated by  $\sim 180^\circ$  and faces the  
204 entrance of the solvent-exposed binding pocket (Fig 4C). Kyna is stabilized mainly by non-polar contacts  
205 in the binding pocket. The only major interaction stabilizing the product is a hydrogen bond between its  
206 hydroxyl group and NE group of Arg141. Interestingly, in all the Kyna-bound chains, Arg36 adopts its  
207 original “outward” conformation (Fig 4C), most likely facilitating the release of the product.

208

209 *Kyn mimics Asp in the active site pocket of Rv3722c*

210 Modelling of Asp and superimposing it with the aliphatic chain of Kyn not only revealed that the amino  
211 groups and  $\alpha$ -carboxylates are superimposable, but also that the carbonyl oxygen of Kyn is at a position

212 analogous to the O6 atom of the carboxyl side chain of Asp (Fig 4D). As a result, the carbonyl oxygen is  
213 well located to hydrogen bond with Arg141 and Arg36. In addition, the binding pose observed in Kyn-  
214 bound Rv3722c allows the aromatic ring to make hydrophobic contacts with nearby residues Tyr69\* and  
215 Ile287\*, further stabilizing the ligand prior to transamination. Our data thus show that the aliphatic  
216 backbone of Kyn mimics the dicarboxylic amino acid Asp, and provide a possible explanation why  
217 Rv3722c – and potentially other AspAT's – display side activity towards the structurally disparate  
218 Kyn<sup>28,29</sup>.

219

220 *Rv0337c/AspC and Rv3565/AspB do not function as AspAT's*

221 Despite the foregoing genetic, structural, microbiological and *in vitro* biochemical evidence establishing  
222 Rv3722c as an essential AspAT, existing annotations of the *Mtb* genome include two additional AspAT's  
223 (Rv3565/AspB and Rv0337c/AspC), one of which (Rv0337/AspC) was also predicted to be essential for *in*  
224 *vitro* growth<sup>7,8</sup>. Unlike Rv3722c, both Rv0337c/AspC and Rv3565/AspB are annotated as class I  
225 AspATs<sup>9,10,31</sup>. We resolved this ambiguity by conducting ABMP on both enzymes. These studies  
226 demonstrated formation of keto-Gln and keto-Ile/Leu with Rv3565/AspB, and  $\alpha$ KG with Rv0337c/AspC  
227 (Fig S11). ABMP in the presence of <sup>15</sup>N-labeled amino acids and their keto acids confirmed these  
228 activities (Fig S12 and S13). These results indicate that Rv0337c/AspC encodes an alanine  
229 aminotransferase AlaT, while Rv3565/AspB encodes an alanine/valine aminotransferase AvtA with  
230 additional activity towards methionine. Both interpretations were confirmed by steady-state kinetic  
231 assays (Fig S14).

232

233 *Rv3722c is the main AspAT in Mtb*

234 To test for other unannotated AspATs in *Mtb*, we traced the metabolic fates of <sup>15</sup>N-Asp and <sup>15</sup>N-Glu in  
235 Rv3722c-sufficient and -depleted *Mtb*, into <sup>15</sup>N-Glu and <sup>15</sup>N-Asp, respectively (Fig 5A). In both cases, we

236 observed strictly Rv3722c-dependent transfer of the labeled amino group to the corresponding keto  
 237 acid, establishing that Rv3722c is the main AspAT in *Mtb*, potentially capable of running in both  
 238 directions.

**Figure 5. Rv3722c is the main aspartate aminotransferase in *Mtb***

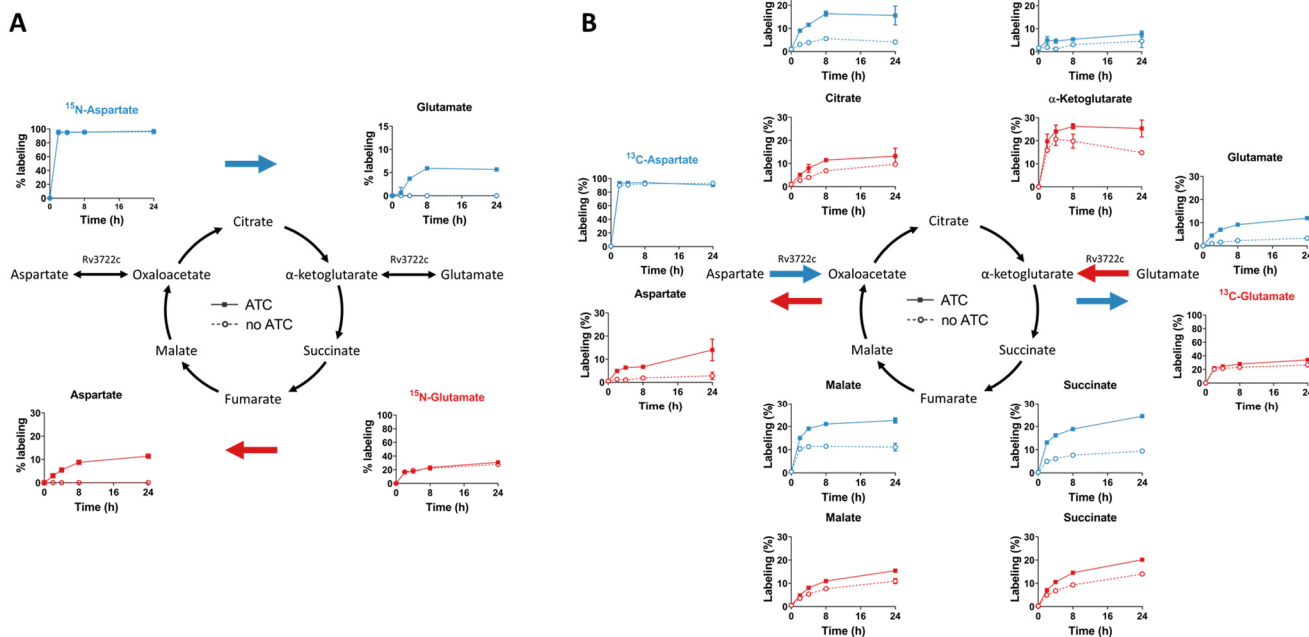

239

240 **Figure 5. Rv3722c is the main aspartate aminotransferase in *Mtb*.** **A)**  $^{15}\text{N}$  stable isotope tracing in  
 241 Rv3722c-proficient and -deficient *Mtb*. Rv3722c-TetON was cultured in 7H9 supplemented with casein  
 242 hydrolysate, with or without ATC, to pre-deplete Rv3722c. After a 3h adaptation to unsupplemented  
 243 7H9 with (solid line) or without ATC (dashed line),  $^{15}\text{N}$ -Asp (blue) or  $^{15}\text{N}$ -Glu (red) was added to the  
 244 media at a final concentration of 3 mM. After 0, 2, 4, 8 and 24h at 37 °C,  $^{15}\text{N}$ -labeling of the indicated  
 245 metabolites was determined using LC-MS. Colored arrows indicate the direction of the Rv3722c-  
 246 mediated reaction. **B)**  $^{13}\text{C}$  stable isotope tracing in Rv3722c-proficient and -deficient *Mtb*. Same as (A),  
 247 but using  $^{13}\text{C}_4$ -Asp (blue) or  $^{13}\text{C}_5$ -Glu (red). Percentages are relative to the sum of all isotopes and  
 248 corrected for natural isotope abundance. Data are presented as mean +/- SD of three experimental

249 replicates (n=3, but n=2 for <sup>15</sup>N-Asp-ATC-4h, <sup>15</sup>N-Glu-ATC-4h and <sup>15</sup>N-Asp-noATC-2h, due to sample loss),  
250 representative of two independent experiments.

251

### 252 *Rv3722c balances anaplerotic and cataplerotic reactions of the TCA cycle*

253 The conversion of Asp to oxaloacetate and Glu to  $\alpha$ KG represent anaplerotic reactions of the TCA cycle,  
254 while their reverse reactions are cataplerotic. Rv3722c's ability to couple one anaplerotic half-reaction  
255 of the TCA cycle with a cataplerotic counterpart suggested that its activity might help enable balanced  
256 entry and exit into and out of the oxidative and reductive arms of the TCA cycle. To test this model, we  
257 incubated *Mtb* with <sup>13</sup>C-labeled Asp and Glu, and monitored for Rv3722c-dependent labeling of TCA  
258 cycle metabolites (Fig 5B). We observed that Asp could serve as carbon source for the TCA cycle in a  
259 manner primarily dependent on Rv3722c and that anaplerosis from Glu could be suppressed in the  
260 absence of Rv3722c. These results thus demonstrate that Rv3722c appears poised to mediate  
261 anaplerosis from Asp and Glu while simultaneously facilitating cataplerosis of their corresponding  
262 partner ketoacids.

263

### 264 *Rv3722c couples nitrogen assimilation to Asp synthesis*

265 Given the ability of Rv3722c to couple Glu and Asp biosynthesis to one another and the widely  
266 conserved role of Glu in primary assimilation of nitrogen, we sought to define the role of Rv3722c in  
267 coupling nitrogen assimilation to Asp biosynthesis. To do so, we exposed pre-depleted Rv3722c-TetON  
268 to a nitrogen up- and downshift, in a minimal medium with ammonia as sole nitrogen source<sup>36</sup>. In *E coli*,  
269 nitrogen upshift causes a rapid decrease in  $\alpha$ KG levels and slight increase in Glu levels<sup>37</sup>. We observed a  
270 similar, though less pronounced, effect in *Mtb*, which was not dependent on Rv3722c (Fig 6). In  
271 Rv3722c-sufficient *Mtb*, the nitrogen-dependent increase in the Glu- $\alpha$ KG ratio resulted in an increase in  
272 Asp synthesis, while no Asp biosynthesis was observed in Rv3722c-deficient cells (Fig 6). These results

273 thus confirm that Asp synthesis is both strictly dependent on Rv3722c and coupled to Glu-mediated  
274 assimilation of inorganic nitrogen.



## Figure 6. Rv3722c links nitrogen assimilation to aspartate synthesis

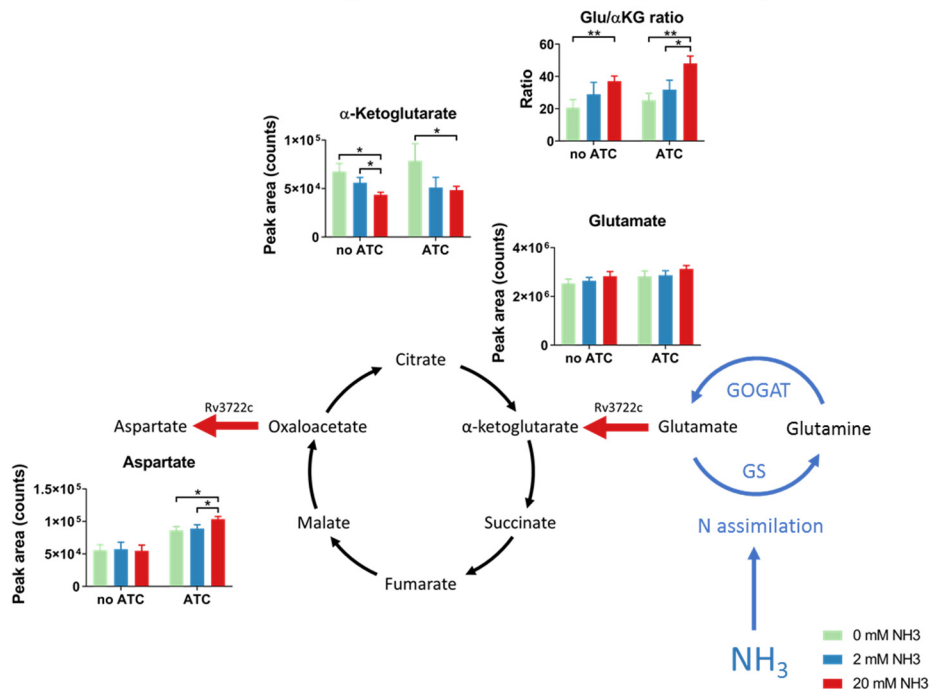

275

276 **Figure 6.** Rv3722c links nitrogen assimilation to aspartate synthesis. Rv3722c-TetON was cultured in  
 277 modified minimal TSM media supplemented with 2 mM ammonium chloride and 1% casein hydrolysate,  
 278 with or without ATC, to pre-deplete Rv3722c. After adaptation (24h) to the same media without casein  
 279 hydrolysate and 2 mM ammonium chloride as sole nitrogen source, the media was replaced with the  
 280 same media containing 0 (green), 2 (blue), or 20 mM (red) ammonium chloride. After 4h at 37 °C, the  
 281 relative levels of the indicated metabolites were determined using LC-MS. Blue arrows indicate reactions  
 282 involved in nitrogen assimilation (GS: glutamine synthetase; GOGAT: glutamine oxoglutarate  
 283 aminotransferase), while red arrows indicate the direction of the Rv3722c-mediated reaction. Data are  
 284 presented as mean +/- SD of three experimental replicates (n=3), representative of two independent  
 285 experiments.

286 *Aspartate supplementation specifically rescues growth*

287 Our initial growth experiments demonstrated that Rv3722c was dispensable in the presence of casein  
 288 hydrolysate, a complex mixture of amino acids and small peptides (Fig 1C). We therefore sought to  
 289 determine the specific amino acid(s) responsible for remedying the growth impairment of Rv3722c-  
 290 deficient *Mtb* by culturing Rv3722c pre-depleted *Mtb* in 7H9 supplemented with each of 19 amino acids.  
 291 Strikingly, only Asp was able to restore growth, linking Rv3722c's *in vitro* activity to its intrabacterial  
 292 metabolic activity and growth (Fig 7A).

**Figure 7. Aspartate supplementation rescues growth and metabolic defects**

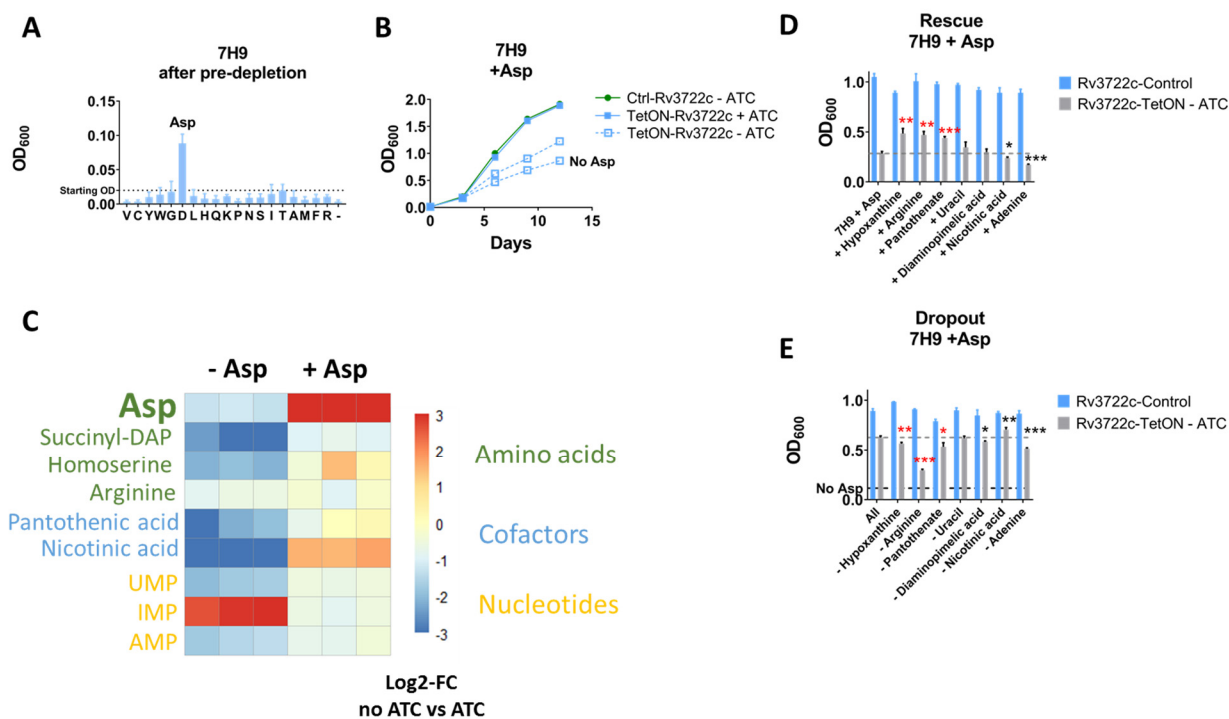

293  
 294 **Figure 7.** Aspartate supplementation rescues growth and metabolic defects. **A)** Rescue screen with  
 295 single amino acids. Rv3722c-TetON was cultured in 7H9 with casein hydrolysate without ATC to pre-  
 296 deplete Rv3722c. After predepletion, bacteria were transferred to 7H9 supplemented with 3 mM of the  
 297 indicated amino acids at a final optical density at 600 nm (OD<sub>600</sub>) of 0.02. Bacterial growth was measured  
 298 after culturing for 12 days at 37°C. Amino acids are abbreviated to their 1-letter code; -: 7H9 control. **B)**

299 Growth curve of Rv3722c-proficient and –deficient *Mtb* in 7H9 culture media supplemented with Asp.  
300 Rv3722c-TetON and Rv3722c-control were cultured in 7H9 culture medium supplemented with 3 mM  
301 Asp, in the presence and absence of anhydrotetracycline (ATC). Data from Rv3722c-TetON cultured in  
302 the absence of ATC and Asp (Fig 1A) was plotted as a reference. **C)** Heatmap showing the levels of Asp  
303 and its essential downstream metabolites. Rv3722c-TetON was cultured in 7H9 (Fig 1A) or 7H9  
304 supplemented with Asp (Fig 7B) with or without ATC for 12 days. Relative levels of the indicated  
305 metabolites were determined using LC-MS. Colors indicate the log<sub>2</sub>-fold change of the LC-MS peak areas  
306 detected without ATC versus those detected with ATC, in the absence (-) or presence (+) of 3 mM Asp.  
307 **D)** Rescue screen with essential Asp metabolites. as A, but supplementing with diaminopimelic acid,  
308 arginine, uracil (at 1 mM) or nicotinic acid, pantothenic acid, adenine or hypoxanthine (at 0.15 mM), in  
309 addition to 3 mM Asp. **E)** Dropout screen with essential Asp metabolites. Same as D, but supplementing  
310 with all but the indicated product. Bacterial growth data in A, B, D and E, and metabolite levels in F, are  
311 presented as mean +/- SD (n=3), while fold changes are presented as mean of a single ratio (n=1 per  
312 square) representative of at least two independent experiments. \*: p<0.05, \*\* p<0.01, \*\*\*p<0.001, by a  
313 non-paired, two-tailed Student's *t*-test (n=3), red asterisks indicate metabolites that significantly  
314 changed growth in the rescue and dropout screen. See also Fig S15.

315

### 316 *Aspartate is required for synthesis of growth-limiting downstream metabolites*

317 The selective, though partial (Fig 7B), rescue by Asp suggested that Rv3722c-deficient cells suffer from a  
318 growth-limiting deficiency of Asp. To confirm this deficiency and explore its consequences on *Mtb*  
319 metabolism, we compared the metabolic profiles of Rv3722c-sufficient and -deficient bacteria, in the  
320 presence and absence of exogenous Asp. We focused on metabolites that are formed from Asp by  
321 enzymes that are essential for *Mtb*<sup>7,8</sup>. Figure 7C depicts the changes related to Asp and its essential  
322 downstream products, while the full metabolite profiles collected under these and other growth

323 conditions are shown in Fig S15. In the absence of exogenous Asp, intracellular Asp levels were reduced  
324 approximately 2-fold in the absence of Rv3722c. Levels of most essential downstream Asp-dependent  
325 products, however, were depleted to a far greater degree than their precursor, Asp (Fig 7C).  
326 Supplementation with Asp restored Asp pools to supraphysiologic levels with a similar accumulation of  
327 several downstream intermediates, such as nicotinic acid and homoserine, but corrected others, such as  
328 succinyl-DAP, less completely (Fig 7C).

329  
330 To identify the specific growth-limiting, Asp-dependent metabolites among those that could not be  
331 corrected by exogenous Asp, we supplemented Asp-containing media with individual downstream  
332 metabolites. No single metabolite could completely restore wild type levels of growth. However, specific  
333 effects of pantothenate, hypoxanthine and Arg were observed in both supplementation and dropout  
334 screens (Fig 7D and E).

335  
336 *Rv3722c regulates Asp-dependent distribution of assimilated nitrogen*

337 Recognizing the ability of Asp to serve as a donor of both carbon and nitrogen<sup>42</sup>, we sought to determine  
338 the specific role of Rv3722c in the distribution of nitrogen via Asp. To do so, we traced the metabolic  
339 fate of the alpha amino nitrogen of Glu and Asp in Rv3722c-sufficient and -deficient *Mtb* incubated with  
340  $\alpha$ -<sup>15</sup>N-Asp or  $\alpha$ -<sup>15</sup>N-Glu after 24h. As expected, we observed <sup>15</sup>N labeling of known Asp-dependent  
341 metabolites following incubation with  $\alpha$ -<sup>15</sup>N-Asp (Fig 8A). Incubation with  $\alpha$ -<sup>15</sup>N-Glu resulted in a  
342 similar, but Rv3722c-dependent, pattern of <sup>15</sup>N labeling (Fig 8A), demonstrating that Rv3722c plays a  
343 non-redundant role in the metabolic distribution of assimilated nitrogen.

344  
345 Among Asp-dependent metabolic intermediates, we noted that levels of the purine nucleotide IMP were  
346 particularly elevated in Rv3722c-deficient *Mtb* with corresponding reductions in the levels of more

347 downstream adenylate nucleotides, both changes being responsive to exogenous aspartate (Fig 7C and  
 348 8B). Moreover, we noted growth of Rv3722c-deficient *Mtb* supplemented with Asp could be further  
 349 augmented with the addition of hypoxanthine but not adenine. Hypoxanthine is a purine salvage  
 350 pathway intermediate that bypasses one of the two Asp-dependent steps in adenylate nucleotide  
 351 biosynthesis (Fig 8B). Metabolic tracing similarly revealed a selective incorporation of  $^{15}\text{N}$ , but not  $^{13}\text{C}$ ,  
 352 into adenylate nucleotides in Rv3722c sufficient-, but not –deficient, *Mtb* (Fig 8B). These results identify  
 353 a metabolically essential and specific role for Asp-derived nitrogen, unlinked to its carbon backbone, in  
 354 *Mtb* growth.

**Figure 8. Rv3722c governs Asp-dependent nitrogen metabolism**

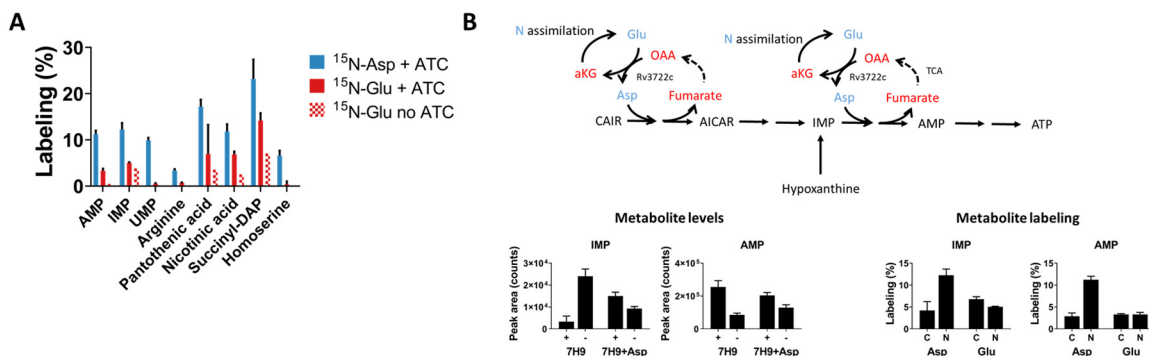

355

356 **Figure 8. Rv3722c governs Asp-dependent nitrogen metabolism. A)**  $^{15}\text{N}$  stable isotope tracing in  
 357 Rv3722c-proficient *Mtb*. Rv3722c-TetON was cultured in 7H9 supplemented with casein hydrolysate  
 358 with and without ATC. After a 3h adaptation to unsupplemented 7H9,  $^{15}\text{N}$ -Asp (blue) or  $^{15}\text{N}$ -Glu (red)  
 359 was added to the media at a final concentration of 3 mM. After 24h at 37°C,  $^{15}\text{N}$ -labeling of the indicated  
 360 metabolites was determined by LC-MS analysis. **B)** Rv3722c serves as a specific nitrogen conduit for *de*  
 361 *novo* purine synthesis. Same as A, but using  $^{15}\text{N}$  and  $^{13}\text{C}$  labeled Asp and Glu. Nitrogen containing  
 362 metabolites are depicted in blue, while their carbon backbones are depicted in red. Data are presented  
 363 as mean +/- SD of two or three experimental replicates (n=2-3), representative of two independent  
 364 replicates. OAA: Oxaloacetic acid; CAIR: Carboxyaminoimidazole ribotide ; AICAR: 5-Aminoimidazole-4-  
 365 carboxamide ribonucleotide.

## 366 Discussion

367 Despite the advent of high throughput sequencing technologies, access to the biological information  
368 encoded within most genomes remains heavily dependent on sequence homology-based inference.  
369 While powerful, this approach has proven least effective for genes encoding the potentially most  
370 specific or unique biological functions of a given genome. Such approaches introduce an often  
371 unrecognized bias towards annotation of widely conserved, rather than species-specific functions<sup>1</sup>.  
372 Here, we applied ABMP to annotate the function of one essential and previously unannotated gene and  
373 two previously misannotated genes predicted to encode the same function. Our work highlights that the  
374 protein annotation gap is bigger than the number of unannotated proteins and includes a generally  
375 under-recognized degree of misannotation.

376 Our study highlights two types of misannotation, one in which two genes were erroneously annotated  
377 as AspATs on the basis of a moderate degree of sequence homology, and another in which the  
378 identity of the actual AspAT was unrecognized. In retrospect, the misannotation of Rv0337c/AspC and  
379 Rv3565/AspB as AspATs can be explained by structural studies demonstrating that the amino acid  
380 sequence of aminotransferases is dominated by their overall fold, rather than active site-specific,  
381 architecture<sup>38-40</sup>. Accordingly, while the *Mtb* genome is bio-informatically predicted to encode several  
382 aminotransferases<sup>41</sup>, only a handful have been biochemically characterized<sup>42-44</sup>.

383 The structure of Rv3722c, in contrast, differs from canonical AspAT's, and belongs to a recently  
384 proposed new subgroup of AspAT's<sup>32</sup>. Members of this subgroup all contain an uncommon auxiliary N-  
385 terminal domain and belong to the relatively uncharacterized protein family PF12897, members of  
386 which are almost exclusively present in bacteria<sup>9,32</sup>. Though the function of the auxiliary N-terminal  
387 domain is unclear, its restricted species distribution and absence in humans represent an opportunity  
388 for selective targeting of an enzyme class for which few selective inhibitors currently exist<sup>45,46</sup>.

389 Through a combination of *in vitro* biochemistry, *in vivo* metabolomics and culture experiments, we now  
390 unambiguously resolve Rv3722c as the primary AspAT of *Mtb*, Rv0337c as an alanine transaminase and  
391 Rv3565 as an alanine-valine transaminase, further analyses of which may improve future sequence-  
392 based predictions.

393 Gene annotations aside, growing evidence has implicated nitrogen metabolism as an essential  
394 determinant of *Mtb*'s pathogenicity<sup>19</sup>. Mutants for the asparaginase AnsA, for example, exhibited  
395 impaired Asn assimilation and were attenuated in macrophages and mice<sup>47</sup>, while mutants for AnsP1  
396 were unable to import Asp *in vitro* and were attenuated in mice<sup>18</sup>. Inhibition of glutamine synthetase, a  
397 key enzyme in nitrogen assimilation, has similarly been shown to be essential for growth in  
398 macrophages and guinea pigs<sup>48</sup>. Together, these studies have established nitrogen assimilation and  
399 uptake as essential determinants of *Mtb*'s pathogenicity.

400 Our discovery of Rv3722c as the primary AspAT of *Mtb* and its essentiality *in vitro* and *in vivo* now  
401 expands this list to include nitrogen distribution. Aminotransferases are pyridoxal phosphate (PLP)-  
402 dependent enzymes that catalyze the reversible transfer of nitrogen from an amino donor to a keto acid  
403 amino acceptor. Aminotransferases are, therefore, indispensable for the liberation and distribution of  
404 nitrogen from amino acids. The aminotransferases involved in nitrogen distribution and their essentiality  
405 in *Mtb*, however, remain largely uncharacterized<sup>49</sup>.

406 *In vitro*, aminotransferases have been shown to have somewhat overlapping substrate specificities, and  
407 *in vivo*, loss of one aminotransferase can often be overcome by artificial overexpression of another<sup>50,51</sup>.  
408 In *E coli*, for example, only strains lacking both aminotransferases AspC and TyrB are Asp auxotrophs<sup>52</sup>.  
409 Aminotransferases have thus come to be viewed as physiologically promiscuous enzymes that catalyze  
410 highly redundant reactions<sup>50,51</sup>.

411 Our studies indicate that *Mtb* has evolved with Rv3722c functioning as its sole AspAT in Glu-containing  
412 environments. Glu is the most prevalent metabolite in many mammalian tissues and bacteria<sup>53-55</sup>.  
413 Together with Gln, Glu is the primary portal of nitrogen assimilation in most bacteria<sup>56</sup>. Even though Asp  
414 is not a part of nitrogen assimilation, an estimated 27% of all assimilated nitrogen is distributed via Asp  
415 for the dedicated biosynthesis of several cofactors, nucleotides and amino acids<sup>57</sup>. Using Glu-based 7H9  
416 culture medium, we show that Rv3722c transfers nitrogen from Glu to Asp, thus linking nitrogen  
417 assimilation to Asp-mediated nitrogen distribution. Synthesis of Asp was required for synthesis of key  
418 downstream metabolites and *in vitro* growth (Fig 1A and 5A). Rv3722c-deficient *Mtb* specifically showed  
419 depletion of these downstream metabolites, most of which could be rescued by Asp supplementation  
420 (Fig 7C). While Asp supplementation in 7H9 did not completely rescue growth (Fig 7B), the ability of  
421 more downstream Asp-dependent products to augment growth beyond that achieved with Asp alone is  
422 a likely indication of a limited flux of exogenous Asp through downstream metabolic pathways. Our  
423 results nonetheless demonstrate a non-redundant and essential role for the AspAT activity of Rv3722c.  
424 Previous work suggested that *Mtb* has access to Asp in host macrophages<sup>58</sup> and that Asp serves as an  
425 important nitrogen source *in vivo*. However, mutants deficient in the sole Asp importer Ansp1 were only  
426 partially attenuated in mice<sup>18</sup>. The severe attenuation of Rv3722c-deficient *Mtb* in mice suggests that  
427 access to Asp is insufficient for *Mtb* to survive during infection in mice and that the main role for  
428 Rv3722c lies in Asp biosynthesis.

429 We also found that Rv3722c produces Asp at a rate that is governed by the  $\alpha$ KG-Glu ratio, which is an  
430 index for the carbon-nitrogen status. It has recently been found that *Mtb* has an extracellular Asp sensor  
431 (GlnH) that regulates the carbon-nitrogen status via GlnX, PknG and finally GarA<sup>59,60</sup>. Moreover,  
432 *Mycobacterium smegmatis* strains deficient for PknG or GarA show markedly altered Asp levels<sup>60</sup>. Taken  
433 together, these results support a model in which Rv3722c produces Asp at a rate that is co-regulated by



434 the presence of extracellular Asp through the  $\alpha$ KG-Glu ratio. Moreover, our results suggest a pivotal role  
435 for Asp biosynthesis, in addition to uptake, for full virulence of *Mtb*.

436 Through the annotation of Rv3722c as the main AspAT in *Mtb* and the link between nitrogen  
437 assimilation and Asp biosynthesis on the one hand, and the characterization of the multifaceted  
438 essentiality of Asp on the other, we have established Asp biosynthesis as a new potential drug target in  
439 *Mtb*.

440

## 441 **Methods**

### 442 *Chemicals*

443 All chemicals were from Sigma, unless stated otherwise. All amino acids were in the L-form, unless  
444 stated otherwise.

445

### 446 *Strains*

447 To create an *Mtb* strain with reduced levels Rv3722c, we employed a protein degradation system  
448 previously described<sup>21</sup>. Briefly, a FLAG epitope followed by a DAS+4 tag was recombineered into the  
449 chromosome of *Mtb* H37Rv, at the 3'-end of the target gene (H37RvMA::Rv3722c-FLAG-DAS or Rv3722c-  
450 Control). Next, the FLAG-DAS-tagged mutant was transformed with a StrepR plasmid containing *sspB*  
451 downstream of an inducible promoter (H37RvMA::Rv3722c-FLAG-DAS::sspB-pTetON-6 or Rv3722c-  
452 TetON)<sup>20</sup>. The *sspB*-expressing plasmid was integrated into the chromosome at the Giles phage  
453 integration site. When induced, SspB delivers DAS-tagged protein to the native protease ClpXP for  
454 degradation. Regulation was achieved by repression of the *sspB* promoter with a reverse tetracycline  
455 repressor (revTetR). RevTetR requires anhydrotetracycline (ATC), which acts as a corepressor, to shut

456 down transcription of *sspB*. Repression of *sspB* suppresses degradation of the DAS-tagged protein.  
457 Phenotypically we thus refer to these mutants as TetON mutants. The recombineering cassette consists  
458 of 500bp flanking sequences around the stop codon of the gene, the DAS tag (inserted at the 3'-end of  
459 the target gene), a loxP site, a unique nucleotide sequence ("molecular barcode", to enable pooled  
460 analysis of multiple strains if desired), and a *hygR* selectable marker. The cassette was synthesized as  
461 dsDNA (GenScript, Piscataway, NJ) in plasmid pUC57 with flanking PmeI sites. The fragment was excised  
462 from the plasmid with PmeI, and used as a double-stranded DNA recombineering substrate<sup>61</sup>. Strains  
463 were confirmed with PCR and drug resistance phenotypic screening. Rv3722c-TetON was grown in the  
464 presence of 500 ng/mL ATC, which was replenished every 3-4 days. Cultures were maintained with 20  
465 µg/mL streptomycin, but streptomycin was not added during experiments.

466

#### 467 *Culture conditions*

468 *Mtb* strains were cultured at 37 °C in a biosafety-level 3 facility in 10 mL standing culture flasks  
469 containing 7H9 (Middlebrook 7H9 Broth; BD) with glycerol (0.2%), sodium chloride (0.85 g/L), D-glucose  
470 (2 g/L), albumin (5 g/L; fraction V, fatty acid-free, Roche) and tyloxapol (0.04%). For specific experiments  
471 strain were grown in 7H9 with added L-amino acids (3 mM) or casamino acids (10 g/L; Hy-Case SF), or in  
472 Sauton's (L-Asn, 4g/L; citric acid, 2 g/L; ferric ammonium citrate, 0.05 g/L; magnesium sulfate, 0.5 g/L;  
473 zinc sulfate 1 mg/L; monopotassium phosphate, 0.5 g/L; glycerol, 6%; tween 80, 0.05%; sodium  
474 hydroxide ad pH 7).

475

#### 476 *Spot assay*

477 Log-phase *Mtb* cultures were diluted to an OD<sub>600</sub> of 0.1 in 7H9, followed by serial 10-fold dilutions. A  
478 volume of 5 µL was spotted onto square plates containing Middlebrook 7H10 agar with or without  
479 casamino acids (10 g/L; Hy-Case SF), and with or without 500 ng/mL ATC.

480

481 *Rescue with amino acids and downstream products*

482 Rv3722c-TetON or Rv3722c-Control was precultured in 7H9 with casamino acids, without ATC, to pre-  
483 deplete Rv3722c. After washing with 7H9 without ATC, bacteria were transferred to 96-well plates  
484 containing 150  $\mu$ L culture medium at a final OD<sub>600</sub> of 0.02. For rescue with amino acids, medium was  
485 supplemented with 3 mM of different amino acids. For rescue with single downstream products,  
486 bacteria were transferred to media containing 3 mM Asp, and homoserine, racemic diaminopimelic acid,  
487 arginine, uracil at 1 mM, or nicotinamide, pantothenic acid, adenine and hypoxanthine at 0.15 mM. The  
488 same concentration were used for the dropout screen. Bacterial growth was monitored at 600 nm using  
489 a platereader (SpectraMax M2e, Molecular devices).

490

491 *ABMP*

492 Activity-based metabolite profiling was performed as described<sup>62</sup>. In brief, a mycobacterial metabolite  
493 extract was incubated with 10  $\mu$ M purified protein in 20 mM TRIS-HCl pH 7.4 or a control (heat-  
494 inactivated protein or buffer). At several time points, samples were collected into ice-cold  
495 acetonitrile:methanol:water (2:2:1; v:v:v). After centrifugation, the samples were analyzed as described  
496 under metabolomics. When described, <sup>15</sup>N-labeled amino acids (10 mM; Cambridge Isotope  
497 Laboratories), or keto acids (20 mM) were added to force the reaction in one direction.

498

499 *Metabolomics*

500 Metabolomics was performed on liquid cultures grown in media with 0.04% tyloxapol, normalized by  
501 OD<sub>600</sub>, after washing twice with cold PBS. Washed cells were resuspended in 1 mL ice-cold  
502 acetonitrile:methanol:water (2:2:1; v:v:v), and processed as described<sup>62</sup>. In brief, samples were bead-  
503 beaten (6 times for 30 s at 6500 rpm; cooled) with 0.1 mm Zirconia/silica beads (BioSpec), followed by

504 clarification (10 min, 21,000 g, 4°C) and filter-sterilization through a 0.22 µm Spin-X filter (Sigma).  
505 Samples were stored at -80 °C until LC-MS analysis. LC-MS metabolomics was performed on non-diluted  
506 samples, using a Diamond Hydride Type C column (Cogent) on an Agilent 1200 LC system coupled to an  
507 Agilent Accurate Mass 6220 Time of Flight (TOF) spectrometer operating in the positive (amino acids)  
508 and negative (keto acids) ionization mode, as described<sup>62,63</sup>.  
509 For the detection of phosphorylated metabolites, malate, citrate and succinate, we used an ion-pairing  
510 LC-MS method. Samples were injected (5 µL) onto a ZORBAX RRHD Extend-C18 column (2.1 x 150 mm,  
511 1.8 µm; Agilent) with ZORBAX SB-C8 (2.1 mm x 30 mm, 3.5 µm; Agilent) precolumn heated to 40 °C, and  
512 separated using a gradient of 5 mM tributylamine/5.5 mM acetate in water:methanol (97:3; v:v)(mobile  
513 phase A) and 5 mM tributylamine/5.5 mM acetate in methanol (mobile phase B) at 0.25 mL/min, as  
514 follows: 0-3.5 min: 0% B, 4-7.5 min: 30% B, 8-15 min: 35% B, 20-24 min: 99% B, 24.5-25 min: 0% B;  
515 followed by 5 minutes of re-equilibration at 0% B (Agilent 1290 Infinity LC system). Post-column, 10%  
516 dimethylsulfoximide in acetone (0.2 mL/min) was mixed with the mobile phases to increase sensitivity.  
517 Data was collected from m/z 50-1100, using an Agilent Accurate Mass 6230 Time of Flight (TOF)  
518 spectrometer with Agilent Jet Stream electrospray ionization source operating in the negative ionization  
519 mode (gas temp: 325 °C, drying gas: 8 L/min, nebulizer: 45 psig, sheath gas temp: 400 °C, sheath gas: 12  
520 L/min, Vcap: 4000 V, Fragmentor: 125 V). Metabolites were identified based on accurate mass-retention  
521 time identifiers for masses exhibiting the expected distribution of accompanying isotopes. The  
522 abundance of extracted metabolite ion intensities was determined using Profinder 8.0 and Qualitative  
523 Analysis 7.0 (Agilent Technologies). Heatmaps were generated in R (version 3.5.2) using the pheatmap  
524 package (version 1.0.12).  
525  
526  
527

528 *Stable isotope tracing*

529 *Mtb* strains were cultured in 7H9 with casamino acids with or without ATC to pre-deplete Rv3722c. To  
530 accommodate large volumes, bacteria were grown in closed 1000L flasks in a shaking incubator. At the  
531 day of the experiment, the cultures were resuspended in 7H9 without tyloxapol and casamino acids at  
532 an OD<sub>600</sub> of 1. After 3 hours, 3 mM <sup>15</sup>N-Glu, <sup>15</sup>N-Asp, <sup>13</sup>C<sub>5</sub>-Glu and <sup>13</sup>C<sub>4</sub>-Asp (Cambridge Isotope  
533 Laboratories) were added. After 0, 2, 4, 8 and 24 h, samples (10 mL) were collected on ice, spun down,  
534 and washed once with cold PBS. Metabolite extraction and LC-MS analysis were performed as described  
535 under metabolomics, but using Agilent Accurate Mass 6545 Quadrupole Time of Flight (Q-TOF). The  
536 percentage of labelling was determined using the batch isotopologue extraction function in Profinder  
537 software (Agilent Technologies), which corrects for natural isotope abundance. In some cases, succinyl-  
538 DAP co-eluted with and interfering signal at the M+2 m/z value. For these cases, the sample was  
539 excluded from the presented data.

540

541 *Nitrogen shift*

542 Rv3722c-TetON was cultured in modified TSM media <sup>64</sup>, containing magnesium sulfate (0.5 g/L), calcium  
543 chloride (0.5 mg/L), zinc sulfate (0.1 mg/L), copper sulfate (0.1 mg/L), ferric iron chloride (50 mg/L),  
544 monopotassium phosphate (0.5 g/L), dipotassium phosphate (1.5 g/L), sodium chloride (0.85 g/L), D-  
545 glucose (2 g/L), albumin (5 g/L; fraction V, fatty acid-free, Roche) and tyloxapol (0.04%). Bacteria were  
546 first grown in modified TSM supplemented with casamino acids (10 g/L; Hy-Case SF) and 2 mM  
547 ammonium chloride, in the presence or absence of ATC to pre-deplete Rv3722c. To accommodate large  
548 volumes, bacteria were grown in closed 1000L flasks in a shaking incubator. Next, the bacteria were  
549 transferred to the same media without casamino acids and tyloxapol, and incubated at 37 °C. After 24 h,  
550 the media was replaced with modified TSM containing 2 mM ammonium chloride (1X NH<sub>3</sub>), 20 mM  
551 ammonium chloride (10X NH<sub>3</sub>) or no ammonium chloride (0X NH<sub>3</sub>). Samples (10 mL) were collected,

552 followed by centrifugation (10 min, 3000 *g*, 4°C). The pellet was resuspended in ice-cold  
553 acetonitrile:methanol:water (2:2:1; v:v:v), and processed and analyzed as described under  
554 metabolomics.

555

#### 556 *Mouse infection*

557 Prior to infection, Rv3722c-TetON was grown Sauton's media with or without 500 ng/mL ATC for 10 days  
558 to pre-deplete Rv3722c. Six- to eight-week-old female BL/6 mice (Jackson Laboratory, Bar Harbor, ME)  
559 were infected in an aerosol chamber Madison chamber (University of Wisconsin). Immediately prior to  
560 infection, cells were sonicated and diluted 1:100 in PBS, and approximately 100–300 cfu administered to  
561 each mouse. Mice were fed regular chow, or chow containing doxycycline at 2000 ppm (Research Diets,  
562 New Brunswick, NJ). Lungs were harvested and plated for cfu on Middlebrook 7H10 agar or Middlebrook  
563 7H9+1.5% Bacto Agar (Difco) containing OADC enrichment (Middlebrook) and 0.2% glycerol with ATC.  
564 Three to five mice per group were harvested at the indicated time points. To determine the number of  
565 non ATC-regulatable mutants, 2 lungs per group collected after 2, 3 and 6 weeks were plated onto plates  
566 with and without ATC. In a similar experiment, mice were infected with pre-depleted Rv3722c-TetON  
567 and wildtype, and fed chow without ATC. Lungs from wildtype mice and Rv3722c-TetON were plated on  
568 plates without ATC, or plates with and without ATC, respectively.

569

#### 570 *Macrophage infection*

571 Femoral mouse bone marrow cells were isolated from 7-8 week-old, male C57BL/6J mice (Jackson  
572 Laboratory) and cultured (37 °C, 5% CO<sub>2</sub>) on Petri dishes containing DMEM with 1% HEPES (Gibco), 10%  
573 FBS and 20% L cell-conditioned medium (LCM) as a source of macrophage colony-stimulating factor. On  
574 day 6, the cells were seeded in 96-well plates containing the same medium with 10% LCM at a density of  
575 6X10<sup>4</sup> cells/well. When indicated, cells were activated by adding 50 ng/mL recombinant mouse IFN

576 gamma (Invitrogen). On day 7, the cells were infected with bacteria (cultures in 7H9 with casamino acids  
577 in the presence or absence of 500 ng/mL ATC to pre-deplete Rv3722c) in triplicate (multiplicity of  
578 infection of 1) for 4h, followed by 2 washes with PBS and the addition of fresh medium with or without  
579 500 ng/mL ATC. On day 0, 3 and 5 post infection, the macrophages were lysed in 0.01% Triton X-100 and  
580 plated onto 7H10 plates containing 10 g/L casamino acids and 500 ng/mL ATC at serial dilutions for cfu  
581 determination. The protocol for was approved by the Institutional Animal Care and Use Committee of  
582 Weill Cornell Medicine.

583

#### 584 *Western Blotting*

585 Cells cultured in 7H9, 7H9 with casamino acids or Sauton's were spun down, resuspended in 1 mL ice-  
586 cold lysis buffer (100 mM NaCl, 5% glycerol, 1 mM dithiothreitol and protease inhibitor cocktail  
587 (cOmplete, EDTA-free; Roche) in 50 mM Tris HCl, pH 8), and transferred to bead-beating tubes  
588 containing 0.1 mm Zirconia/silica beads (BioSpec). After bead-beating 3 times for 30 s at 6500 rpm in a  
589 cooled bead-beater (Precellys tissue homogenizer), samples were clarified and filter-sterilized as  
590 described under metabolomics. Samples were mixed with Laemmli sample buffer (Bio-Rad) with  $\beta$ -  
591 mercaptoethanol, and denatured (10 min, 95 °C) Approximately 7.5  $\mu$ g of total protein (as determined  
592 by A280 on a Nanodrop; Thermo Fisher Scientific) was loaded onto 8-16% TGX gels (Bio-Rad) and run in  
593 SDS-PAGE buffer for 30 minutes at 90V followed by 45 minutes at 150 V. Proteins were transferred onto  
594 Protran 0.2  $\mu$ m nitrocellulose blotting membranes (Amersham) (300 mA, 100 min, 4 °C; or 30 mA  
595 overnight, 4 °C). After washing (PBS-Tween, 30 min, room temperature) and blocking (Odyssey blocking  
596 solution; LI-COR Biosciences, 1 h, room temperature), the membranes were incubated with monoclonal  
597 mouse anti-FLAG antibody M2 (Sigma; 1:400) and rabbit anti-prcB (a gift from G. Lin and C. Nathan,  
598 1:10,000) overnight at 4 °C. Next, the membranes were incubated with goat anti-mouse (LI-COR  
599 Biosciences, 1:20,000) and goat anti-rabbit (LI-COR Biosciences, 1:20,000) for 2 h at room temperature

600 in Odyssey blocking buffer:PBS-Tween (1:1). After washing, proteins were detected using the Odyssey  
601 Infrared Imaging System (LI-COR Biosciences). If required, the amount of loaded protein was normalized  
602 based on the intensity of the proteasome subunit B (PrcB) loading control band in exploratory Western  
603 blots.

604

#### 605 *Protein expression and purification*

606 For ABMP, *Rv3722c* was cloned in a pET23(+) vector encoding a C-terminal His<sub>6</sub>-tag, and transformed  
607 into BL21-AI cells (Thermo Fisher). Expression was induced at 37 °C, with 0.2 mM IPTG and 0.2% L-  
608 arabinose for 18 h. Cells were spun down, frozen at -80 °C, resuspended in 2X PBS with 10 mM  
609 imidazole, 1 mM pyridoxal phosphate, 5% glycerol, protease inhibitors (cOmplete, EDTA-free; Roche)  
610 and 1 µg/ml DNase I, and disrupted using an Emulsiflex C5 (Avestin). After centrifugation, the lysate was  
611 loaded onto a Ni<sup>2+</sup> column (HiPrep IMAC FF 16/10; GE Healthcare), followed by elution with a gradient of  
612 10-250 mM imidazole in 2X PBS with 10 mM imidazole, 1 mM pyridoxal phosphate, 5% glycerol.  
613 *Rv3722c*-containing fractions were pooled and concentrated over Amicon ultra 30 KDa cutoff filter  
614 (Millipore). After buffer exchange with 50 mM Tris-HCl pH8 with 5% glycerol, the protein was loaded  
615 onto a HiPrep Q HP 16/10 and eluted with a gradient of 0-1M NaCl in 50 mM Tris-HCl pH 8 with 5%  
616 glycerol. *Rv3722c*-containing fractions were concentrated and the buffer was exchanged with 50 mM  
617 Tris-HCl pH 8 with 5% glycerol and 100 mM NaCl.

618 For structure determination, *Rv3722c* cloned into a modified pET28 vector encoding a TEV protease  
619 cleavage site followed by a C-terminal His<sub>6</sub>-tag, was chemically transformed into *E. coli* BL21 (DE3) cells.  
620 Protein production and purification was performed as outlined above, albeit, with minor modifications.  
621 Here, 0.1 mM IPTG was used to induce overnight expression at 18 °C. In addition, after Ni-NTA affinity  
622 purification, the His<sub>6</sub>-tag was removed using TEV protease and the protein was subjected to size  
623 exclusion chromatography (HiPrep 26/60 Sephacryl S-200; GE Healthcare) using a buffer consisting of 40



624 mM HEPES pH 7.4 and 150 mM NaCl. Fractions of pure Rv3722c were pooled, concentrated, flash frozen  
625 and stored at -80 °C until further use.

626

627 For ABMP, Rv0337 and Rv3565 were produced and purified using a similar approach. However, the  
628 overexpression and production of both enzymes was carried out in *E. coli* C41 (DE3) cells. Furthermore,  
629 before Rv0337 was eluted off the Ni-NTA column, an additional step, adapted and modified from<sup>65</sup>, was  
630 introduced to remove contaminating chaperones.

631

### 632 *Ketoglutaramate preparation*

633 Ketoglutaramate was prepared and purified as described by Jaisson et al<sup>66</sup>. In brief, glutamine was  
634 oxidized by *Crotalus adamanteus* L-amino acid oxidase in the presence of catalase. After protein  
635 precipitation, the reaction mixture was purified over an AG 50W-X8 column (Bio-Rad), neutralized, and  
636 dried under a vacuum. The MS/MS fragmentation spectra were obtained using the LC-MS method  
637 described under metabolomics, but using an Agilent accurate mass 6545 Quadrupole-  
638 Time of Flight (Q-TOF) spectrometer operated at a collision energy of 10, 20 and 40.

639

### 640 *Enzyme activity assays*

641 Substrate screens for Rv3722c were performed by incubating 1 μM protein, 1 mM amino acid, and 10  
642 mM keto acid (αKG, oxaloacetate or pyruvate) in 150 μL 10 mM Tris-HCl pH 7.4 containing 10 μM  
643 pyridoxal phosphate at 37°C in triplicate. Samples were collected at 0, 5, 10, 30 and 60 minutes and  
644 quenched in ice-cold acetonitrile:methanol (1:1) spiked with 0.1 mM <sup>13</sup>C<sub>5</sub>, <sup>15</sup>N-L-glutamic acid, <sup>13</sup>C<sub>4</sub>, <sup>15</sup>N-L-  
645 aspartic acid or <sup>13</sup>C<sub>1</sub>-L-alanine (Cambridge Isotope Laboratories) as internal standard for reactions with  
646 αKG, oxaloacetate or pyruvate, respectively. Samples were stored at -80 °C until RapidFire analysis.

647

648 Rv3722c enzyme kinetics were determined by incubating purified protein (0.01  $\mu$ M for L-Asp and L-Kyn,  
649 1  $\mu$ M for other substrates) with 10 mM  $\alpha$ KG and amino acid concentrations ranging from 0.05 to 20 mM  
650 in 10 mM Tris-HCl pH 7.4 containing 10  $\mu$ M pyridoxal phosphate at 37°C in triplicate. Samples were  
651 collected at 0, 0.5, 1, 2, 5, 10 and 20 minutes and quenched in ice-cold acetonitrile:methanol (1:1)  
652 spiked with 0.1 mM  $^{13}\text{C}_5$ ,  $^{15}\text{N}$ -L-glutamic acid as internal standard (Cambridge Isotope Laboratories).  
653 Samples were stored at -80 °C until RapidFire analysis. Measured initial velocities were fitted to  
654 Michaelis-Menten kinetics using Graphpad Prism 7 software.  
655  
656 96-well plates containing enzyme activity samples were analyzed using a RapidFire high throughput MS  
657 system coupled to a 6495 triple quadrupole mass spectrometer (Agilent). Samples were loaded onto a  
658 HILIC type H1 cartridge with acetonitrile with 0.1 % formic acid, followed by a wash with the same  
659 mobile phase. Elution was performed with 20% acetonitrile in water with 0.1 % formic acid. The settings  
660 were as follows: Aspirate: 600 ms; Load/Wash: 100 ms; Elute: 5000 ms; Re-equilibrate: 4000 ms; flow:  
661 1.25 mL/min. The mass spectrometer was set to trace the following transitions in positive ionization  
662 mode: Glutamate: m/z 148->84, CE 16;  $^{13}\text{C}_5$ ,  $^{15}\text{N}$ -Glutamate: m/z 154->89, CE 16; Aspartate: m/z 134->74,  
663 CE 10;  $^{13}\text{C}_4$ ,  $^{15}\text{N}$ -Aspartate: m/z 139->77, CE 10; Alanine: m/z 90 -> 44, CE 15;  $^{13}\text{C}$ -Alanine: m/z 91 -> 45, CE  
664 15.  
665  
666 Rv0337c/AspC and Rv3565/AspB enzyme kinetics were determined by a coupled reaction with lactate  
667 dehydrogenase. Purified recombinant enzymes (1  $\mu$ M) were incubated with 10 mM keto acid (sodium 3-  
668 methyl-2-oxobutyrate (keto-Val), ( $\pm$ )-3-methyl-2-oxovaleric acid sodium salt (keto-Ile), sodium 4-methyl-  
669 2-oxovalerate (keto-Leu), 2-oxoadipic acid (keto-aminoadipic acid),  $\alpha$ -keto- $\gamma$ -(methylthio)butyric acid  
670 sodium salt (keto-Met) and  $\alpha$ KG), and L-Ala concentrations ranging from 0 to 20 mM, in 100 mM Tris-HCl  
671 pH 7.4 containing 10  $\mu$ M pyridoxal phosphate, 0.5 U/mL L-lactate dehydrogenase from rabbit muscle

672 (Roche) and 1 mM NADH (Roche) at 37°C in triplicate. The disappearance of NADH was followed  
673 spectrophotometrically at 340 nm using a SpectraMax M2e (Molecular Devices) microplate reader.  
674 Measured velocities were fitted to Michaelis-Menten kinetics using Graphpad Prism 7 software.

675

#### 676 *Protein crystallization and Structure determination*

677 Rv3722c (~40 mg/mL) was co-crystallized with ligands by sitting drop vapor diffusion at 17 °C. Rv3722c  
678 pre-incubated with 5 mM L- glutamic acid at 25 °C for an hour, was added to an equal volume of  
679 reservoir solution containing 100 mM sodium acetate pH 4.5, 200 mM Li<sub>2</sub>SO<sub>4</sub> and 50% PEG 400.  
680 Similarly, Rv3722c pre-incubated with 10 mM L- kynurenine, was mixed with a reservoir solution  
681 containing 100 mM Na<sub>2</sub>HPO<sub>4</sub>: citric acid pH 4.2, 40 % ethanol and 5 % PEG 1000. Before data collection,  
682 the crystals were cryoprotected in the mother liquor containing 25% glycerol and flash frozen in liquid  
683 nitrogen.

684 Diffraction datasets for Rv3722c/L-glutamic acid were collected on beamline 23 ID at Argonne National  
685 Laboratory APS synchrotron. The data were indexed, integrated and scaled using PROTEUM3 software  
686 (Version 2016.2, Bruker AXS Inc). Data were truncated in CCP4 suite<sup>67</sup> and the structure was solved by  
687 molecular replacement using the unliganded structure of the same enzyme (PDB 5C6U) as a search  
688 model in MOLREP<sup>68</sup>.

689 Data for Rv3722c/L-kynurenine were also collected on beamline 23 ID at Argonne National Laboratory  
690 APS synchrotron. Data were auto processed in XDS<sup>69</sup>. The unmerged data were corrected for anisotropy  
691 using the STARANISO webserver (<http://staraniso.globalphasing.org/cgi-bin/staraniso.cgi>). The structure  
692 was solved by molecular replacement as described above.

693 The models were iteratively refined in PHENIX<sup>70</sup> and built manually in COOT<sup>71</sup>. Ligand models and  
694 dictionary files were created in ELBOW BUILDER from the PHENIX<sup>70</sup> suite and fitted into the density in

695 COOT<sup>71</sup>. Ligand OMIT maps were calculated using Polder Maps<sup>72</sup> in PHENIX. All figures were prepared in  
696 Chimera<sup>73</sup>. Data collection and refinement statistics are given in Table S1. The coordinates and maps of  
697 Rv3722/Glu and Rv3722/KYN have been deposited into the Protein Data Bank under accession codes  
698 6U78 and 6U7A, respectively.

#### 699 *Phylogenetic distribution*

700 A precomputed bacterial distribution of pfam family PF12897 was downloaded from Annotree  
701 (AnnoTree v1.1.0; GTDB Bacteria Release 03-RS86; Pfam v27.0; E-value of 0.00001)<sup>74</sup> and visualized in  
702 Interactive Tree of Life<sup>75</sup>.

703

## 704 **Acknowledgements**

705 We thank Carl Nathan for critical reading of the manuscript, and the Bill and Melinda Gates Foundation  
706 TB Drug Accelerator Program (OPP1177930), NIH Tri-I TBRU (U19-AI11143), NIH NIAID Functional  
707 Genomics Program (U19-AI107774) and the Pott's Memorial Foundation for support.

## 708 **Author contributions**

709 RJ performed and analyzed all western blots, enzyme kinetics, macrophage infections, *in vitro* culture  
710 and metabolomics experiments; LM, RH, RJ and BS cloned, expressed and purified aminotransferases;  
711 LM, RH and JS crystalized proteins and solved their structures; SW, KG and ER performed and analyzed  
712 the mouse infection experiments; JP generated the Rv3722c mutant; RJ, KR, KG, ER, LM and JS designed  
713 the experiments and RJ, KR, LM and JS wrote the manuscript. All of the authors have read, edited, and  
714 approved the paper.

## 715 **Supplementary Information**

### 716 **Results**

#### 717 *Structure solution of Rv3722c in complex with glutamic acid*

718 The X-ray diffraction data of Rv3722c in complex with Glu was initially reduced in the tetragonal crystal  
719 system and was found to belong to the  $P4_22_12$  space group. Molecular replacement using the ligand free  
720 structure of the same enzyme (PDB ID: 5C6U) as a search model, yielded a solution comprising of a  
721 dimer in the asymmetric unit. Attempts, however, to refine the solution were unsuccessful, as the  $R_{\text{free}}$   
722 stalled above 40%. Analysis of the data in Xtriage in Phenix<sup>70</sup>, revealed that the intensity statistics  
723 significantly deviated from those expected for a good to reasonable and untwinned data. In addition,  
724 the Patterson function revealed the presence of an off-origin peak at fractional coordinates (0.500 0.500  
725 0.388), with a height approximately 45% of the origin. It has been reported that crystal pathologies such  
726 as twinning or pseudo-symmetry, can lead to wrong space group assignment because the data have an  
727 apparent high symmetry than its actual symmetry<sup>76 77</sup>. Indeed, when the data was re-indexed in the  
728 lower symmetry  $P222$  point group, the space group was found to be  $P2_12_12$ . The structure was solved by  
729 molecular replacement as described above. The resulting solution had four molecules (two dimers) in  
730 the asymmetric unit. Subsequent analysis of the data in Xtriage revealed it displayed both pseudo-  
731 merohedral twinning and pseudo translation. As a result, the twin law (-h, l, k) was used in the final  
732 round of refinement.

#### 733 *Overall structure of Rv3722c*

734 For the structure of Rv3722c/Glu complex, residues 3 – 422 could be built into the electron density and  
735 was refined with  $R_{\text{work}}$  equal to 19.3 % and  $R_{\text{free}}$  equal to 21.6 % (Table S1). On the other hand, Rv3722c  
736 after pre-incubation with L-kynurenine crystallized in the trigonal  $P3_1$  space group and diffracted to 2.15

737 Å. There were eight molecules in the asymmetric unit. Residues 2 – 428 could be built into electron  
738 density and was refined with  $R_{work}$  equal to 17.9 % and  $R_{free}$  equal to 21.9 % (Table S1).

739

740 The overall fold of Rv3722c is similar to that of members of the recently founded Type Ic group of PLP  
741 binding proteins<sup>32</sup>. Each monomer consists of a core domain (Leu53 - Asp305) that folds into a nearly  
742 perfect  $\alpha/\beta$  motif comprised of a central eight -stranded (predominantly antiparallel)  $\beta$ - sheet  
743 surrounded by eight  $\alpha$ - helices. The auxiliary domain (Pro8 - Ser52 and Gly303 - Leu423), on the other  
744 hand, stacks and forms an elongated segment on top of the core domain and consists of five  $\alpha$  – helices  
745 and an antiparallel  $\beta$ - sheet. A VAST search<sup>78</sup> showed that the overall structure of Rv3722c was similar to  
746 the aspartate transaminase from *Corynebacterium glutamicum* (PDB 5IWQ)<sup>32</sup>. The root mean square  
747 difference across 418 C $\alpha$  atom pairs is 1.1 Å. The two enzymes also share a high degree of sequence  
748 homology with 55% identity and 72% similarity.

#### 749 *Rv3722c complexed with substrate glutamic acid*

750 From the structure of the Glu pre-incubated protein we observed positive electron density in the active  
751 sites of the molecules in the asymmetric unit. We observed clear electron density of Glu along that of  
752 PLP in chain B (Fig 4A and Fig S7). The rest of the chains were only bound to PLP.

753 Glu binds in the active site pocket located in the convergence of the auxiliary and core domain. The  
754 amino group of Glu is in close proximity to the aldehyde group of PLP at a distance of 2.8 Å. The  $\alpha$ -  
755 carboxylate of Glu forms hydrogen bonds with (NH1; 2.90 Å) and (NH2; 2.8 Å) groups of the guanidinium  
756 side chain of Arg392. The carboxylate side chain of Asp140, whose protonation state is unclear, is within  
757 range (3.6 Å) to interact with the  $\alpha$ -carboxylate group of Glu. AspAT's coordinate side chain carboxylate  
758 groups of dicarboxylic substrates through a conserved active site arginine (or sometimes a lysine)<sup>33,79</sup>. In  
759 Rv3722c the corresponding residue is Arg141 and it forms salt bridges with the side chain carboxylate

760 group Glu (NH<sub>2</sub>; 4.40 Å). Hydrophobic contacts with Tyr69\* and Ile287\* (\* denotes a residue from the  
761 second monomer) further stabilize Glu in the binding pocket.

762 *Rv3722c in complex with substrate kynurenine and product kynurenic acid*

763 We observed different ligand bound states in the molecules making the asymmetric unit of the crystals  
764 of Rv3722c pre-incubated with L-kynurenine (Kyn) (Fig S7 and S8). For accurate ligand modelling, Polder  
765 omit maps were generated<sup>72</sup>. The binding pocket of chain A is bound to the external aldimine  
766 intermediate PLP-kynurenine (PLP-Kyn) while the keto acid product, kynurenic acid (Kyna), was bound in  
767 chains B, C, D and G. In chains E, F and H, however, the map in the binding pocket was deemed  
768 uninterpretable and was left unmodeled.

769 The binding of Kyn induced only the rearrangement of the sidechain of Arg36 in the active site pocket,  
770 compared to the ligand free structure of Rv3722c (Fig S10). In the unbound form of Rv3722c, the  
771 positively charged guanidinium side chain of Arg36 points outwardly and lies above the entrance of the  
772 active site pocket. However, upon binding Kyn, the C $\alpha$  of Arg36 shifts by ~ 1 Å and the guanidinium side  
773 chain is moved inwardly by ~ 12 Å (measured from the C $\zeta$  atom) to interact with Kyn (Figure S10). This  
774 ligand induced conformation is reminiscent of, but serves a totally opposite function than, the so called  
775 “arginine switch” observed in Type Ia AspAT<sup>35</sup>. An overlay of the Kyn bound with that of the ligand free  
776 structure of Rv3722c, shows that Arg36 is not in a position to sterically clash with the bulky side chain of  
777 Kyn (Figure S10). This observation suggests that the ligand-induced movement is necessary for the  
778 recognition and stabilization of the aromatic ligand. Apart from interacting with Kyn, Arg36 is locked in  
779 position by interacting with Asp140 through a bidentate salt bridge (NH1 and O $\delta$ 2; 3.6 Å) and (NH2 and  
780 O $\delta$ 1; 3 Å).

781 In addition to being linked to PLP, the  $\alpha$ -carboxylate group of Kyn forms a hydrogen bond (NH1; 2.9 Å)  
782 and a salt bridge (NH2; 3.5 Å) with Arg392. The carbonyl oxygen of Kyn is hydrogen bonded to (NE; 3.1

783 Å) of Arg36. The carbonyl group of Kyn is also hydrogen bonded (NE; 3.1 Å) to the side chain of Arg141.  
784 The arene ring of Kyn forms hydrophobic contacts with Tyr69\* and Ile287\*.  
785 In the first half reaction of transamination, the active site lysine residue abstracts a proton from C $\alpha$  of  
786 the external aldimine yielding a quinoid intermediate<sup>36</sup>. The same Lys residue reprotonates the cofactor  
787 to generate the ketimine intermediate, which is subsequently hydrolyzed to release the keto acid of the  
788 amino donor while generating PMP. In our structure, we observed a sharp peak of a water molecule in  
789 close proximity to both the active site Lys257 residue and PLP-KYN external aldimine (Figure S8A). It is  
790 tempting to speculate that this is the water molecule responsible to hydrolyze the PLP-KYN  
791 intermediate, generating Kyna.  
792 Interestingly, the product Kyna adopts a different pose relative to its precursor (Fig S8). In comparison to  
793 Kyn, the carboxylate group of Kyna is rotated by  $\sim 180^\circ$  and faces the entrance of the solvent-exposed  
794 binding pocket (Figure 4C). Unlike Kyn, the product is engaged mainly by non-polar interactions in the  
795 binding pocket. The hydroxyl group forms a hydrogen bond with (NE; 2.6 Å) of Arg141. Interestingly, in  
796 the product bound chains, Arg36 adopts its original “outward” conformation, most likely facilitating the  
797 release of the product (Figure 4C and S8). Additional hydrophobic contacts with Tyr139, Tyr69\*, Ile287\*  
798 stabilize Kyna in the binding pocket.

#### 799 **Proposed structural basis for Kyn recognition by Rv3722c**

800 ABMP and enzyme kinetic studies indicated that Rv3722c had significant side activity for the aromatic  
801 metabolite L-kynurenine. To our surprise, none of the aromatic amino acids were preferred by Rv3722c  
802 as amino donors. The crystal structure of Rv3722c bound to L-kynurenine provide clues why it is a  
803 suitable amino donor over the other aromatic ligands. Firstly, it appears that Arg141 is strategically  
804 positioned to demarcate the binding pocket and restrict the pose adopted by ligands in the pocket.  
805 Indeed, the binding pose adopted by Kyn could explain why it a preferred substrate. The aliphatic



806 backbone of Kyn mimics the dicarboxylic amino acid Asp (Fig 4D). Modelling of Asp and superimposing it  
807 with the aliphatic chain of Kyn reveals that not only are the amino groups and  $\alpha$ -carboxylates  
808 superimposable, but also importantly, the carbonyl oxygen of Kyn is at an analogous position as the O6  
809 atom of the carboxyl side chain of Asp (Fig 4D). As a result, this allows it form hydrogen bonds with  
810 Arg141 and Arg36. In addition, this binding pose allows aromatic ring to hydrophobic contacts with  
811 Tyr69\* and Ile287\* – further stabilizing the ligand prior to transamination. The presence of the carbonyl  
812 group in Kyn and the lack thereof in aromatic amino acid substrates such as Trp, Phe and Tyr, appears to  
813 be a selectivity factor for binding in the active site pocket as well as the capacity to serve as an amino  
814 donor. Indeed, we also observed that 3-hydroxykynurenine, which is structurally similar to Kyn, could be  
815 used as an amino donor by Rv3722c (data not shown) – further supporting the importance of the  
816 carbonyl group in the recognition and utilization of these aromatic ligands as substrates. Taken together,  
817 these data provide insights as to why, in addition to its cognate dicarboxylic acid substrates, Rv3722c is  
818 able to bind in the same pocket and utilize as a substrate, the structurally disparate aromatic ligand Kyn.  
819 Lastly, the high degree of residue conservation in the active sites of Type Ic AspATs, suggests that side  
820 activity towards Kyn could be a hallmark of these enzymes. However, the physiologic relevance of this  
821 side activity, especially in the context of *Mycobacterium tuberculosis*, remains unclear and worth  
822 exploring.

### 823 **Table S1. Data collection and refinement statistics.**

| Data collection    | Rv3722/Glu                        | Rv3722c/KYN                       |
|--------------------|-----------------------------------|-----------------------------------|
| Resolution range   | 48.33 - 2.60 (2.693 - 2.60)       | 48.36 - 2.237 (2.342 - 2.237)**   |
| Space group        | P 2 <sub>1</sub> 2 <sub>1</sub> 2 | P 3 <sub>1</sub>                  |
| Unit cell          | 87.784 173.691 173.515 90 90 90   | 108.398 108.398 321.344 90 90 120 |
| Total reflections  | 616709 (53667)                    | 1325833 (32443)                   |
| Unique reflections | 82156 (8067)                      | 177427 (7803)                     |

|                                       |                |                 |
|---------------------------------------|----------------|-----------------|
| <b>Multiplicity</b>                   | 7.5 (6.6)      | 7.5 (4.2)       |
| <b>Completeness (spherical, %)</b>    | 99.76 (99.36)  | 87 (29.9)       |
| <b>Completeness (ellipsoidal, %)</b>  | -              | 89.5 (34.2)     |
| <b>Mean I/sigma(I)</b>                | 9.4 (3.2)      | 10.7 (1.8)      |
| <b>Wilson B-factor</b>                | 34.04          | 30.89           |
| <b>R-merge</b>                        | 0.148 (0.564)  | 0.138 (0.692)   |
| <b>R-pim</b>                          | 0.057 (0.232)  | 0.053 (0.370)   |
| <b>CC1/2</b>                          | 0.996 (0.810)  | 0.996 (0.630)   |
| <b>Reflections used in refinement</b> | 82130 (8067)   | 178462 (5059)   |
| <b>Reflections used for R-free</b>    | 3937 (355)     | 8908 (272)      |
| <b>R-work</b>                         | 0.193(0.2540)  | 0.1792 (0.2452) |
| <b>R-free</b>                         | 0.216 (0.3047) | 0.2193 (0.2725) |
| <b>Number of non-hydrogen atoms</b>   | 13087          | 27421           |
| <b>macromolecules</b>                 | 12921          | 26019           |
| <b>ligands</b>                        | 58             | 357             |
| <b>solvent</b>                        | 108            | 1045            |
| <b>Protein residues</b>               | 1675           | 3382            |
| <b>RMS (bonds)</b>                    | 0.003          | 0.010           |
| <b>RMS (angles)</b>                   | 0.64           | 1.28            |
| <b>Ramachandran favored (%)</b>       | 96.45          | 97.98           |
| <b>Ramachandran allowed (%)</b>       | 3.43           | 2.02            |
| <b>Ramachandran outliers (%)</b>      | 0.12           | 0.00            |
| <b>Rotamer outliers (%)</b>           | 0.00           | 0.40            |
| <b>Clashscore</b>                     | 4.73           | 5.41            |
| <b>Average B-factor</b>               | 31.69          | 36.90           |
| <b>macromolecules</b>                 | 31.82          | 36.98           |

|         |       |       |
|---------|-------|-------|
| ligands | 29.65 | 41.30 |
| solvent | 17.16 | 33.25 |

824

825 Statistics for the highest-resolution shell are shown in parentheses.

826 \*\*Resolution limit after anisotropy correction using STARANISO.

827

828

## 829 Supplemental Figures

**Figure S1. Rv3722c is dispensible in defined Sauton's minimal media**

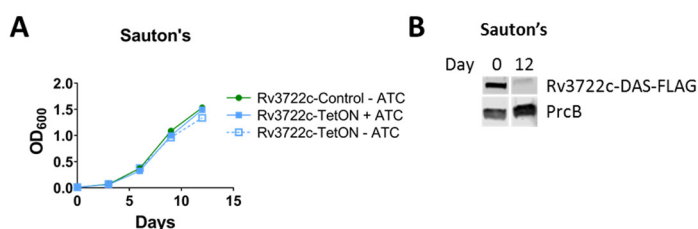

830

831 **Figure S1.** Rv3722c is dispensible in defined Sauton's minimal media **A)** Growth curve of Rv3722c-

832 proficient and -deficient *Mtb* in defined Sauton' s minimal media. Rv3722c-TetOn and Rv3722c-control

833 cultured in Middlebrook 7H9 culture media with 500 ng/mL anhydrotetracycline (ATC) were used to

834 inoculate Sauton's minimal media with and without 500 ng/mL ATC. Bacterial growth was monitored for

835 12 days, by optical density at 600 nm. Data are represented as mean +/- SD of three experimental

836 replicates (n=3), representative of at least two independent experiments. **B)** Western blot showing

837 depletion of Rv3722c after 12 days of culturing in Sauton's without ATC (A). Protein lysates were

838 analyzed by Western blotting, using an  $\alpha$ -FLAG antibody. The proteasome subunit  $\beta$  (PrcB) was used as

839 loading control.

## Figure S2. Rv3722c is required for virulence in mice

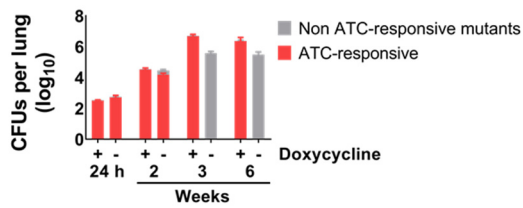

840

841 **Figure S2.** Rv3722c is required for virulence in mice. Mice were infected with aerosolized Rv3722c-  
842 TetON pre-cultured in Sauton's with and without ATC to generate Rv3722c-proficient and -deficient  
843 *Mtb*, respectively. After infection, mice were fed chow with (Rv3722c-proficient *Mtb*) or without  
844 (Rv3722-deficient *Mtb*) doxycycline. The number of CFU's were assessed by plating serial dilutions on  
845 7H10 solid media with ATC. The number of non ATC-responsive mutants were determined by plating on  
846 7H10 solid media with and without ATC (n=2). Data are represented as mean +/- SD (n=3-5). Within 3  
847 weeks after aerosol infection of mice, Rv3722-deficient *Mtb* were almost completely replaced by escape  
848 mutants that were no longer ATC-responsive.

849

## Figure S3. Rv3722c functions as an aminotransferase

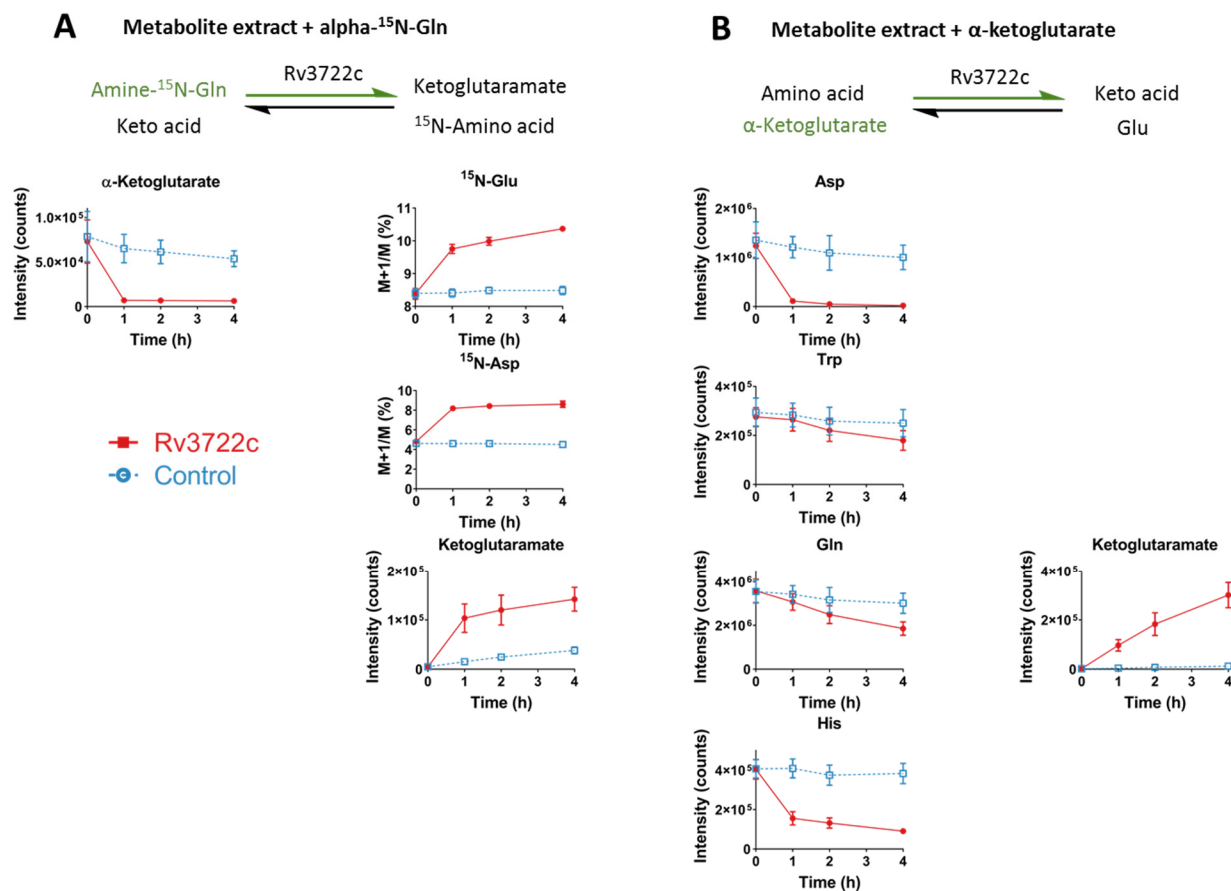

850

851 **Figure S3.** Rv3722c functions as an aminotransferase. **A)** Activity-based metabolite profiling (ABMP) with  
 852 Rv3722c in the presence of  $\alpha$ - $^{15}\text{N}$ -Gln. Purified recombinant Rv3722c (10  $\mu\text{M}$ ; red line) or a heat-  
 853 inactivated control (10 min 95  $^{\circ}\text{C}$ ; blue line), was incubated with a mycobacterial metabolite extract  
 854 supplemented with 10 mM  $\alpha$ - $^{15}\text{N}$ -Gln for 0, 1, 2 and 4 h at 37  $^{\circ}\text{C}$ , and analyzed using untargeted LC-MS.  
 855 **B)** Activity-based metabolite profiling (ABMP) with Rv3722c in the presence of  $\alpha$ -ketoglutarate. Same as  
 856 A, but using a mycobacterial metabolite extract supplemented with 20 mM  $\alpha$ -ketoglutarate. Colored  
 857 arrows indicate the forced direction of the Rv3722c-mediated reaction. Relative metabolite levels are  
 858 represented as intensity, while  $^{15}\text{N}$ -labeling is presented as the ratio M+1/M, which was not corrected  
 859 for naturally occurring isotopes. Data are presented as mean +/- SD (n=3).

Figure S4. Rv3722c substrate screen

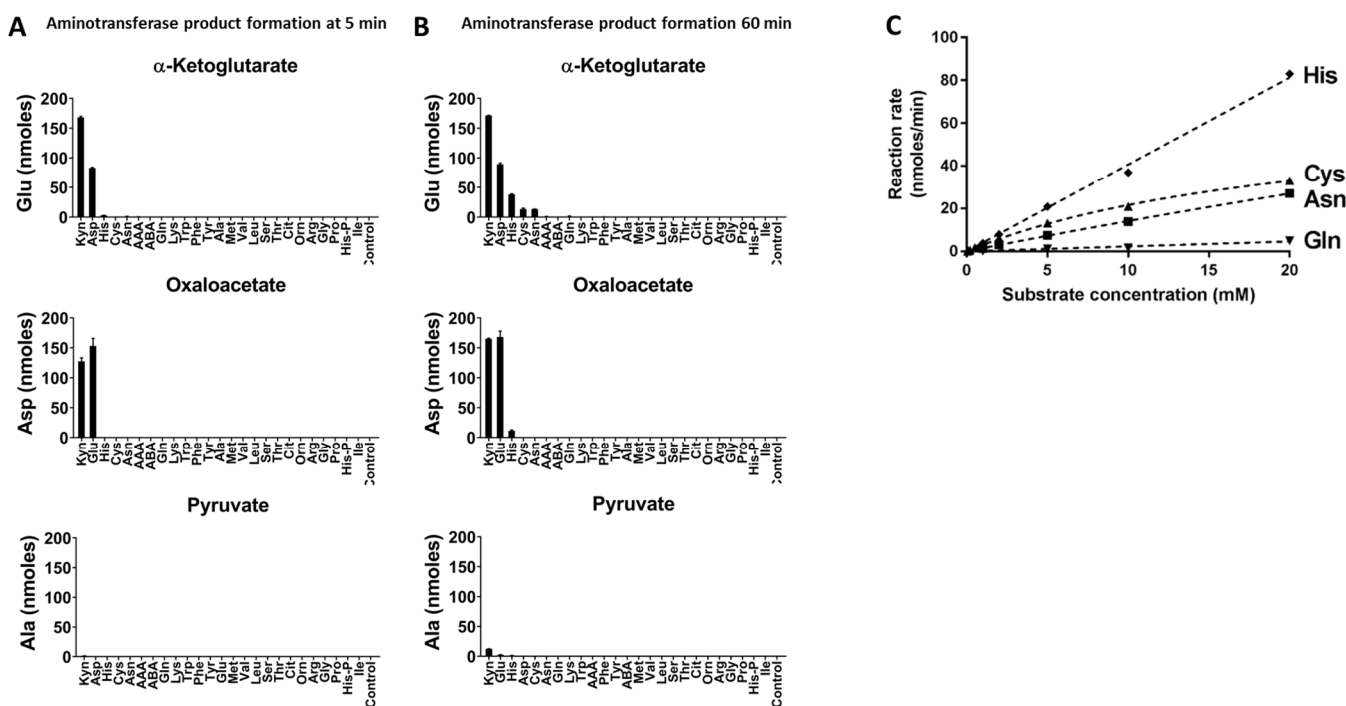

860

861 **Figure S4.** Rv3722c substrate screen. **A)** Rv3722c product formation after 5 min incubation. Purified  
862 recombinant Rv3722c (1  $\mu$ M) was incubated with a panel of amino acids (1 mM) and 3 common keto  
863 acids ( $\alpha$ -ketoglutarate, oxaloacetate or pyruvate; 10 mM). After 5 minutes at 37°C, product formation  
864 (Glu, Asp or Ala for  $\alpha$ -ketoglutarate oxaloacetate or pyruvate, respectively) was measured by RapidFire  
865 mass spectrometry. **B)** Rv3722c product formation after 60 min incubation. Same as A, but after  
866 incubating for 60 minutes. Data are presented as mean  $\pm$  SD (n=3). AAA: aminoadipic acid; ABA: 2-  
867 aminobutyric acid; Cit: citrulline; Orn: ornithine; His-P: histidinol phosphate. **C)** Steady-state enzyme  
868 kinetics of Rv3722c for His, Cys, Asn and Gln. Purified recombinant Rv3722c (1  $\mu$ M) was incubated with  
869 10 mM  $\alpha$ -ketoglutarate and increasing concentrations of amino donors at 37 °C. Glu formation was  
870 measured by RapidFire mass spectrometry and used to determine initial reaction rates. Data were fitted  
871 to Michaelis-Menten kinetics using Graphpad Prism software and are represented as mean  $\pm$  SD (n=3).

**Figure S5. PF12897 family members are present in selective bacterial phyla**

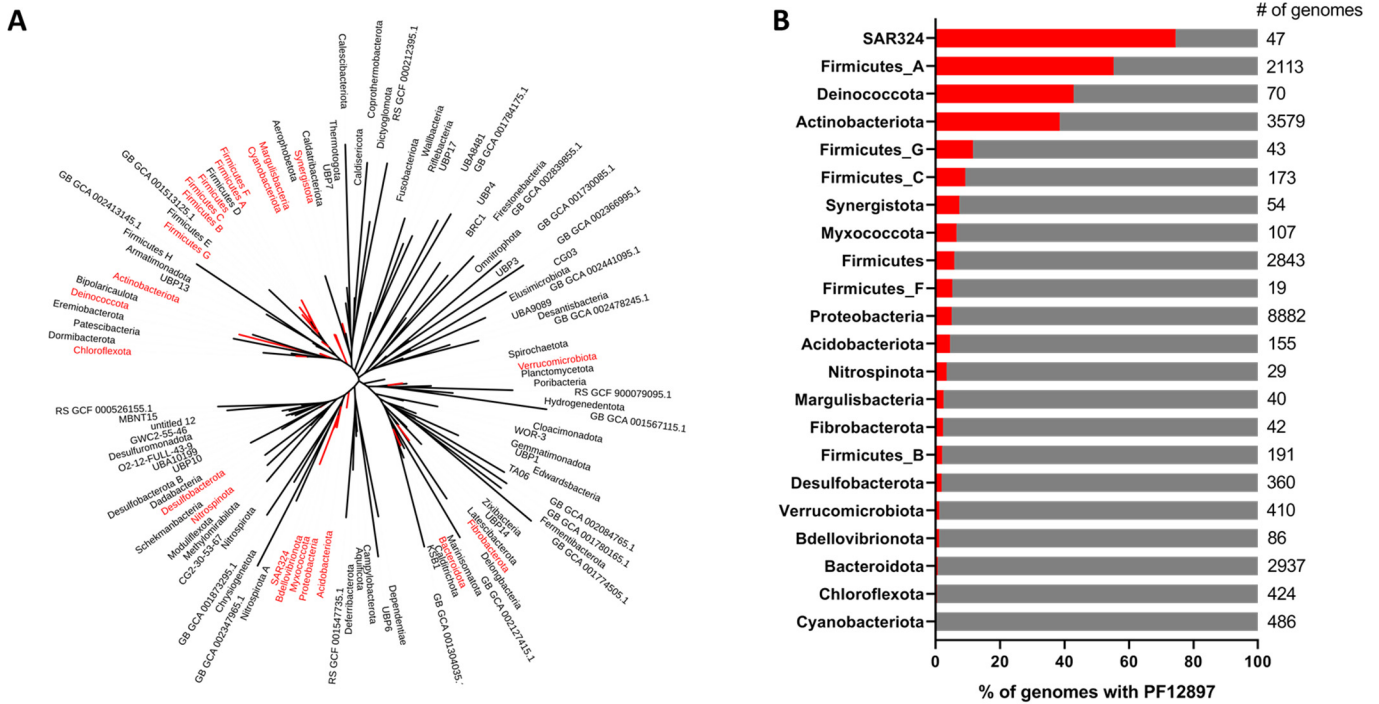

872

873 **Figure S5. PF12897 family members are present in selective bacterial phyla. A)** Phylogenetic tree

874 showing the distribution of PF12897 across bacterial phyla. Phyla highlighted in red contain at least 1

875 genome containing a PF12897 family member. **B)** PF12897 frequency and size of phyla containing

876 PF12897 family members.

877

**Figure S6. Rv3722c is a type Ic PLP-binding protein**

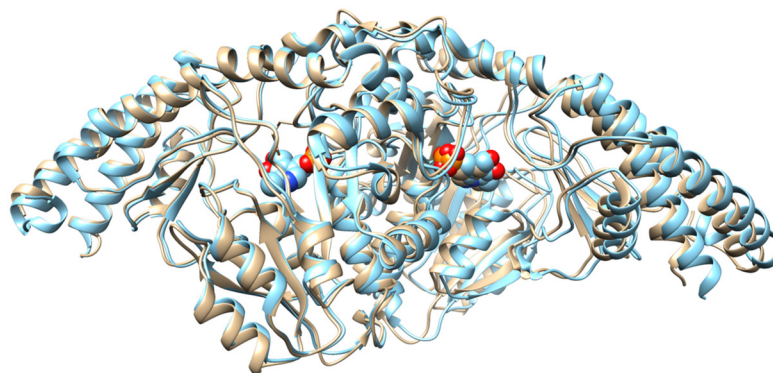

878

879 **Figure S6.** Rv3722c is a type Ic PLP-binding protein. Ribbon representation of the superposition of

880 Rv3722c (tan) with the type Ic AspAT from *Corynebacterium glutamicum* (5IWQ; cyan). The cofactor PLP

881 is shown as spheres in the active site pocket.



882

**Figure S7. Polder OMIT map of glutamate in the active site of Rv3722c**

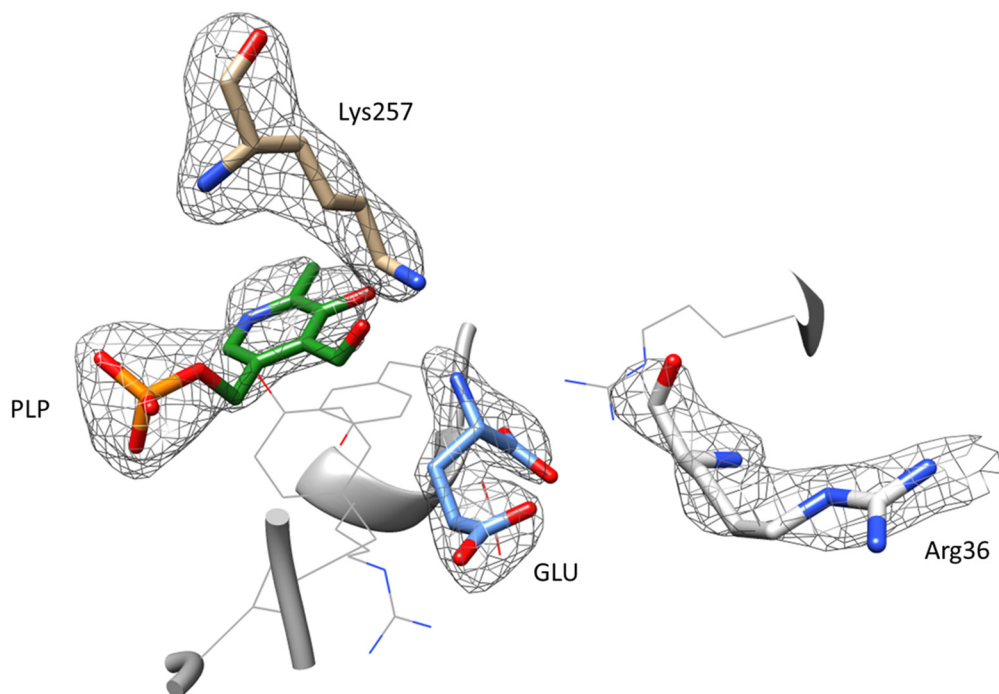

883

884 **Figure S7.** Polder omit map of glutamate in the active site of Rv3722c. The catalytic Lys257 residue is  
885 shown to highlight its position relative to pyridoxal-phosphate (PLP). Arg36 does not undergo any  
886 conformational change upon binding of GLU. The map is contoured at  $3\sigma$ . Other coordinating residues  
887 are shown as wire for clarity.

**Figure S8. Polder OMIT map of the PLP-kynurenine intermediate and Arg 36 in the active site of Rv3722c**

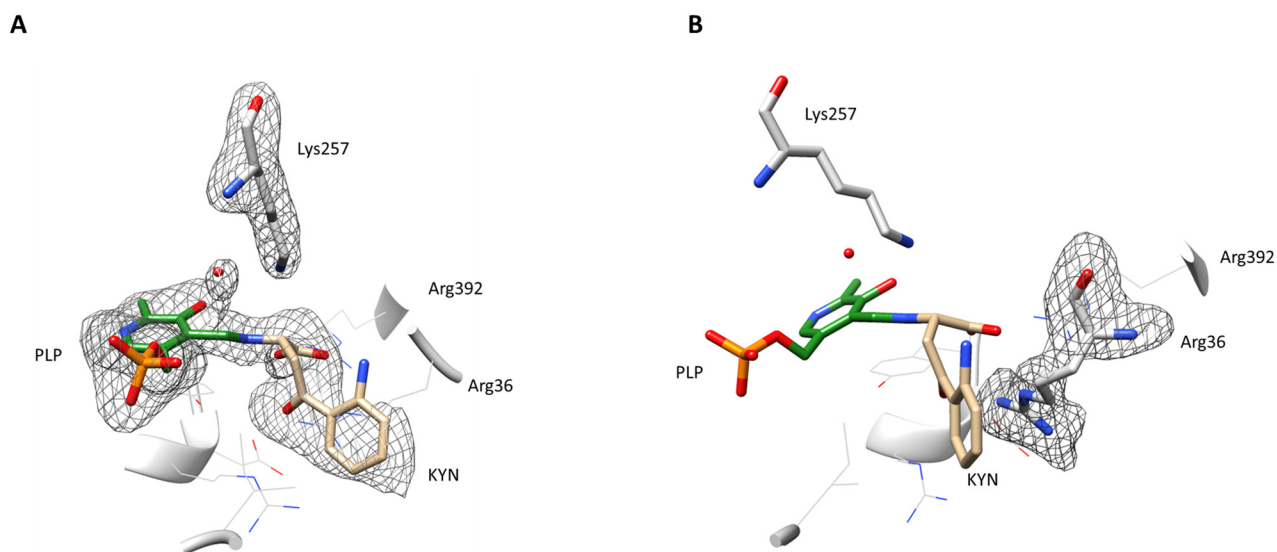

888

889 **Figure S8.** Polder omit map of the PLP-Kynurenine intermediate. **A)** The catalytic Lys257 residue is  
890 shown to highlight its clear detachment from pyridoxal-phosphate (PLP). A water molecule is found to  
891 be in close proximity to both the active site Ly257 and the PLP-KYN intermediate. **B)** Upon binding KYN,  
892 Arg36 undergoes a conformational change. The maps are contoured at 4  $\sigma$ . Other coordinating residues  
893 are shown as wires for clarity. Some atoms of the arene ring of KYN did not have electron density.

**Figure S9. Polder Omit map of PMP and kynurenic acid in the active site of Rv3722c**

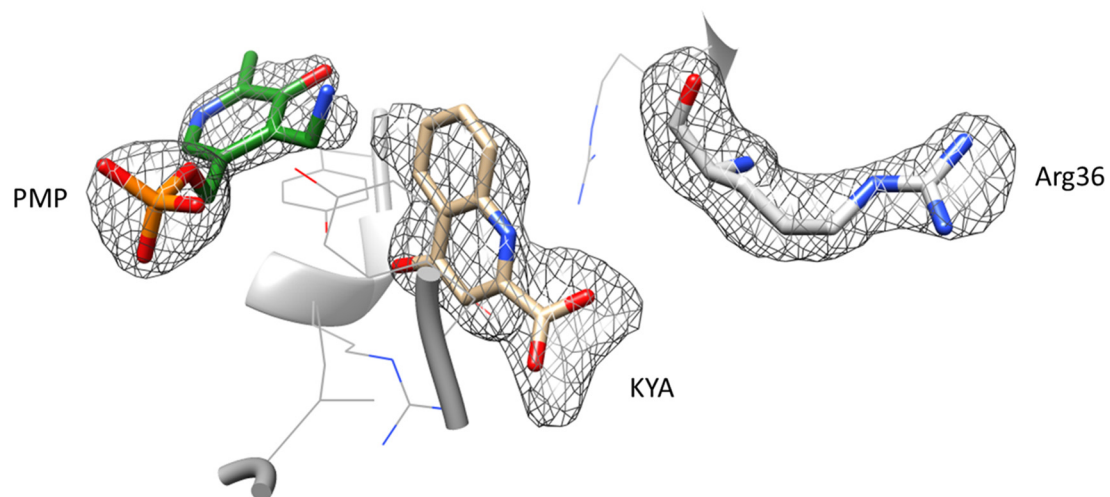

894

895 **Figure S9.** Polder omit map of PMP and kynurenic acid in the active site of Rv3722c. The product

896 kynurenic acid (KYA) adopts a different pose relative to kynurenine. Arg36 adopts its outward

897 conformation. The map is contoured at 4  $\sigma$ . Other active site residues have been as wires for clarity.

898 PMP: pyridoxamine phosphate.

**Figure S10. Binding of kynurenine induces a conformational change**

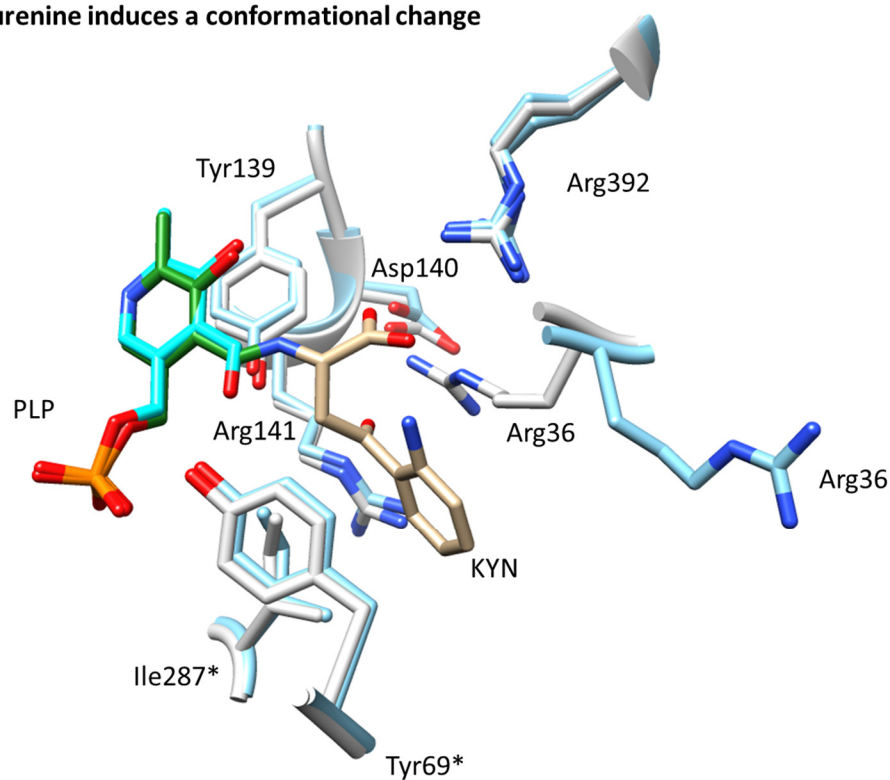

899

900 **Figure S10.** Binding of kynurenine induces a conformational change. Stick and ribbon representation of  
901 the superposition of the active sites of ligand free Rv3722c (5C6U; cyan) and PLP-KYN intermediate  
902 bound (grey) structures. The binding of kynurenine induces a conformational change of Arg36, resulting  
903 in the residue to move inwards to with the ligand.

**Figure S11. Activity-based metabolite profiling on Rv3565/AspB and Rv0337c/AspC**

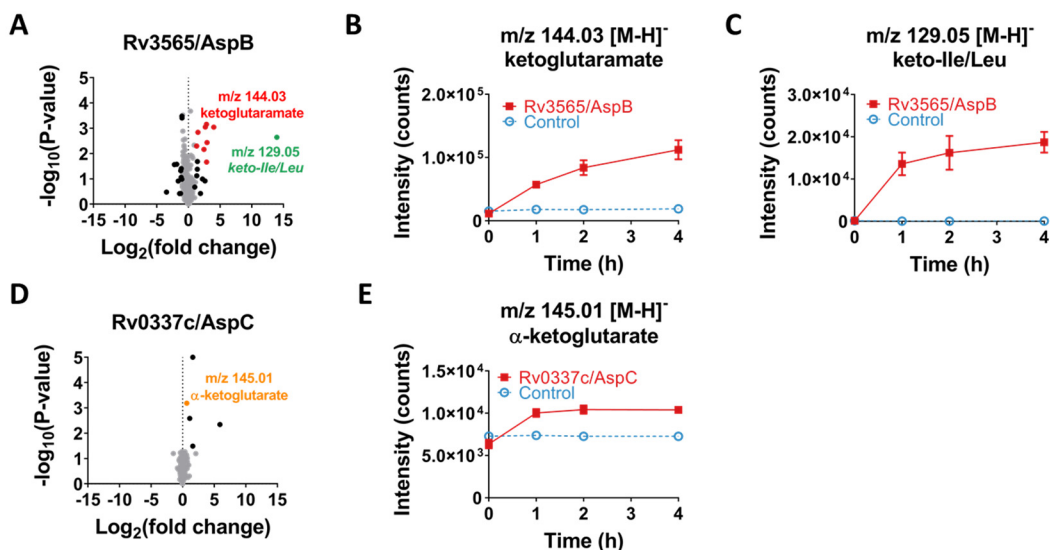

904

905 **Figure S11.** Activity-based metabolite profiling on Rv3565/AspB and Rv0337c/AspC. **A)** Volcano-plot of  
906 activity-based metabolite profiling with purified recombinant Rv3565/AspB. Purified recombinant  
907 Rv3565 (10  $\mu\text{M}$ ) was incubated with a mycobacterial metabolite extract for 0 h or 4 h at 37  $^{\circ}\text{C}$ , and  
908 analyzed using untargeted LC-MS. Each dot represent a feature (a chromatographic peak with a specific  
909  $m/z$ ) in the negative ionization mode; red dots represent features related (fragments, adducts, dimers  
910 and isotopes) to ketoglutaramate ( $m/z$  144.03 [M-H]<sup>-</sup>), while black dots represent uncharacterized  
911 features with a fold change greater than 2 and p-value below 0.05 ( $n=3$ ). **B)** Time- and Rv3565-  
912 dependent formation of ketoglutaramate. **C)** Time- and Rv3565-dependent formation of keto-Leu/Ile  
913 ( $m/z$  129.05 [M-H]<sup>-</sup>; keto-Ile/Ile could not be distinguished based on mass or retention time). **D)**  
914 Volcano-plot of activity-based metabolite profiling with purified recombinant Rv0337c/AspC. Same as A,  
915 but using Rv0337c/AspC incubated for 0 h or 1h at 37  $^{\circ}\text{C}$ . The orange dot represents  $\alpha$ -ketoglutarate  
916 ( $m/z$  145.01 [M-H]<sup>-</sup>) while black dots represent uncharacterized features with a fold change greater than  
917 2 and p-value below 0.05 ( $n=3$ ). **E)** Time- and Rv0337c-dependent formation of  $\alpha$ -ketoglutarate. Data in  
918 panel B, C and E are presented as mean  $\pm$  SD ( $n=3$ ).

**Figure S12. Rv3565/AspB functions as an aminotransferase**

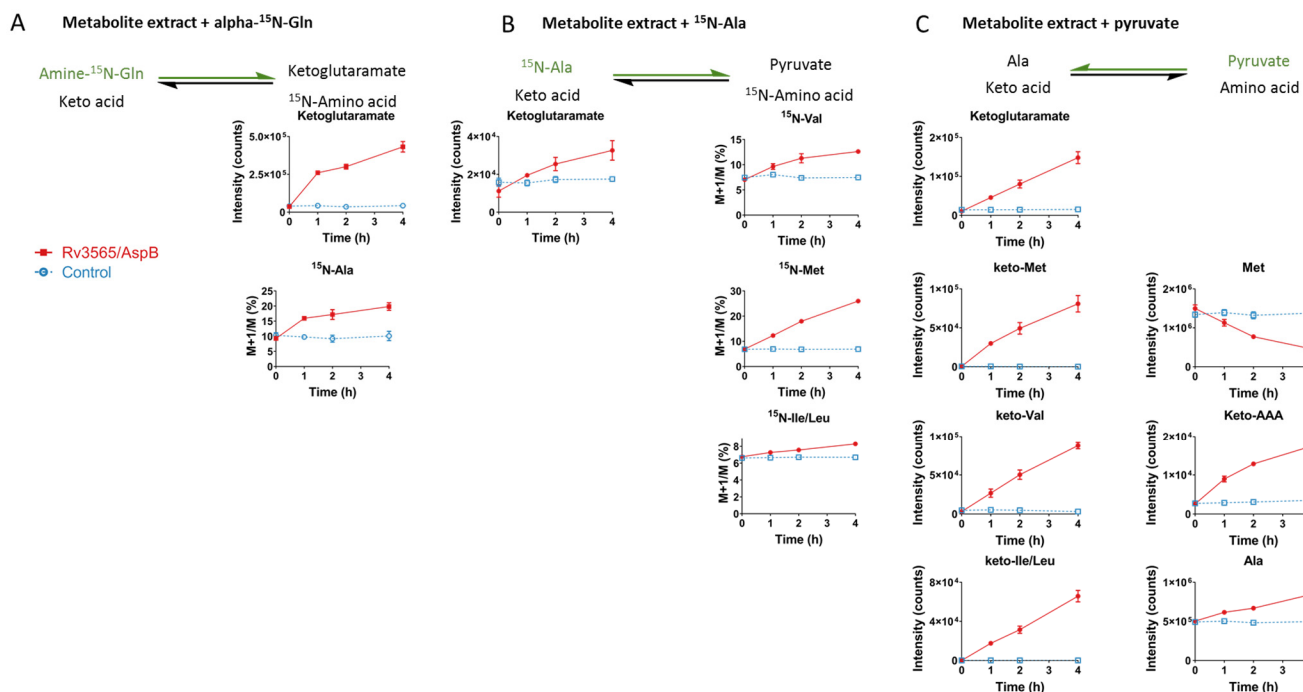

919

920 **Figure S12. Rv3565/AspB functions as an aminotransferase. A)** Activity-based metabolite profiling with  
 921 Rv3565 in the presence of  $\alpha$ -<sup>15</sup>N-Gln. Purified recombinant Rv3565 (10  $\mu$ M; red line) or a buffer control,  
 922 was incubated with a mycobacterial metabolite extract supplemented with 10 mM  $\alpha$ -<sup>15</sup>N-Gln for 0, 1, 2  
 923 and 4 h at 37 °C, and analyzed using untargeted LC-MS. **B)** Activity-based metabolite profiling with  
 924 Rv3565 in the presence of <sup>15</sup>N-Ala and  $\alpha$ -ketoglutarate. Same as A, but using a mycobacterial metabolite  
 925 extract supplemented with 10 mM <sup>15</sup>N-Ala. **C)** Activity-based metabolite profiling with Rv3565 in the  
 926 presence of pyruvate. Same as A, but using a mycobacterial metabolite extract supplemented with 20  
 927 mM pyruvate. Colored arrows indicate the forced direction of the Rv3565-mediated reaction. Relative  
 928 metabolite levels are represented as intensity, while <sup>15</sup>N-labeling is presented as the ratio M+1/M, which  
 929 was not corrected for naturally occurring isotopes. Keto-AAA, keto-Val, keto-Met, Keto-Ile/Leu: keto acids  
 930 of the corresponding amino acids. Data are presented as mean +/- SD (n=3).

**Figure S13. Rv0337c/AspC functions as an aminotransferase**

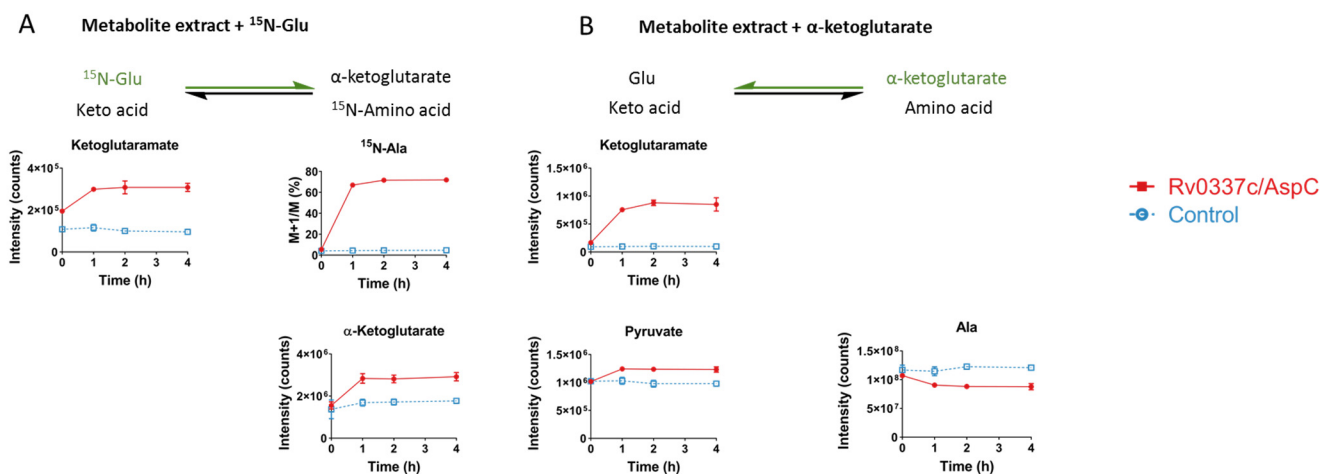

931

932 **Figure S13.** Rv0337c/AspC functions as an aminotransferase. **A)** Activity-based metabolite profiling with  
 933 Rv0337c in the presence of  $\alpha$ - $^{15}\text{N}$ -Gln. Purified recombinant Rv0337c (10  $\mu\text{M}$ ; red line) or a buffer  
 934 control, was incubated with a mycobacterial metabolite extract supplemented with 10 mM  $\alpha$ - $^{15}\text{N}$ -Gln for  
 935 0, 1, 2 and 4 h at 37  $^{\circ}\text{C}$ , and analyzed using untargeted LC-MS. **B)** Activity-based metabolite profiling with  
 936 Rv0337c in the presence of  $\alpha$ -ketoglutarate. Same as A, but using a mycobacterial metabolite extract  
 937 supplemented with 20 mM  $\alpha$ -ketoglutarate. Colored arrows indicate the forced direction of the  
 938 Rv0337c-mediated reaction. Relative metabolite levels are represented as intensity, while  $^{15}\text{N}$ -labeling is  
 939 presented as the ratio M+1/M, which was not corrected for naturally occurring isotopes. Data are  
 940 presented as mean +/- SD (n=3).

**Figure S14. Rv3565/AspB functions as AvtA and Rv0337c/AspC as AlaT**

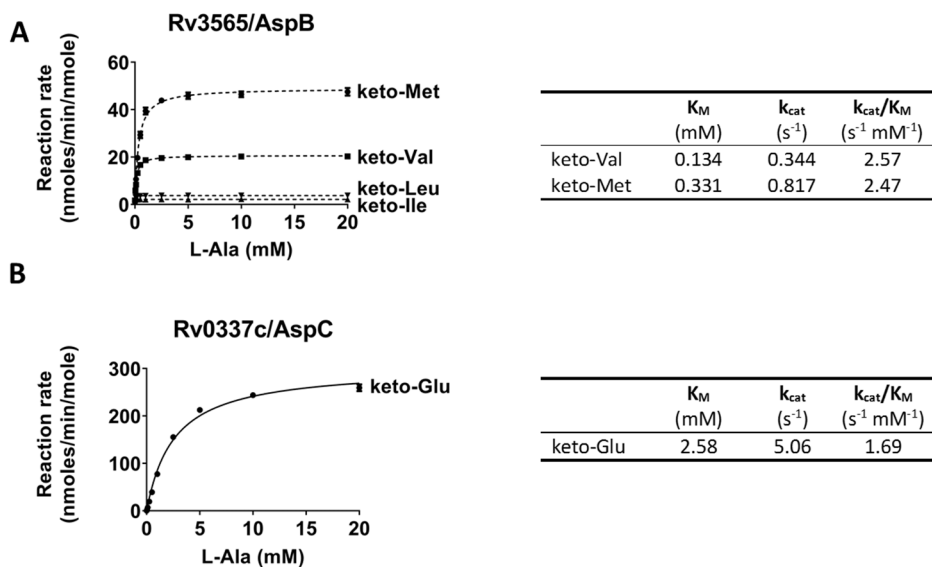

941

942 **Figure S14.** Rv3565/AspB functions as AvtA and Rv0337c/AspC as AlaT. **A)** Steady-state enzyme kinetics

943 of Rv3565/AspB . Purified recombinant Rv3565 (1  $\mu$ M) was incubated with 10 mM keto acids and

944 increasing concentrations of alanine at 37 °C. Pyruvate formation was measured using a coupled

945 reaction with lactate dehydrogenase. Measured velocities were fitted to Michaelis-Menten kinetics

946 using Graphpad Prism 7 software. **B)** Steady-state enzyme kinetics of Rv0337c/AspC. Same as A, but for

947 Rv0337c. Data are presented as mean +/- SD.



**Figure S15. Rv3722c deficiency results in widespread metabolic changes**

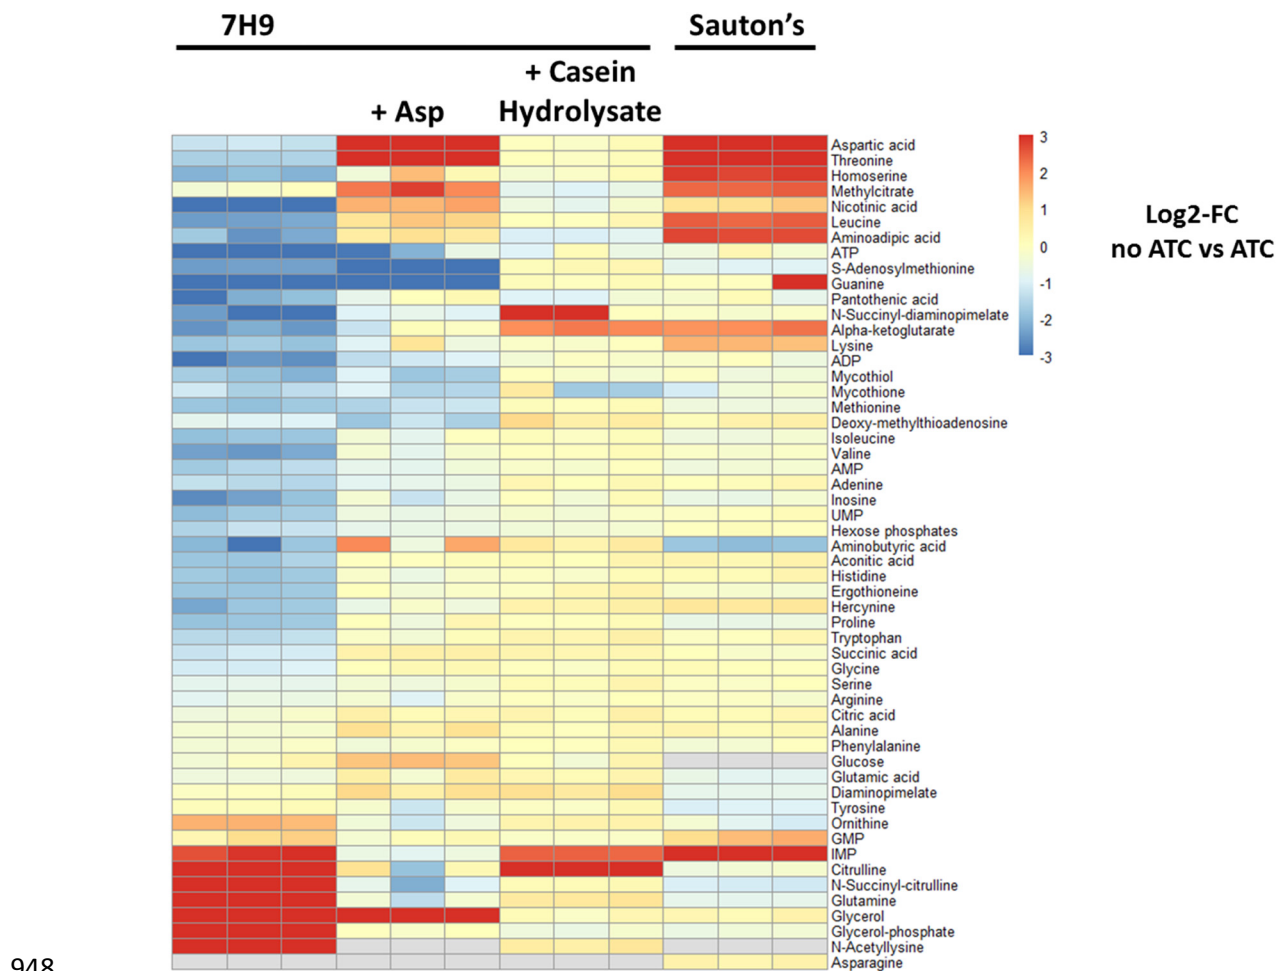

948

949 **Figure S15.** Rv3722c deficiency results in widespread metabolic changes. Heatmap showing the log<sub>2</sub>-fold

950 change in metabolite levels in growth permissive and non-permissive culture media (Fig 1A, C, E and 7B).

951 Rv3722c-TetON and Rv3722c-control, were cultured in 7H9, 7H9+3 mM aspartate, 7H9+ 1% casein

952 hydrolysate (all with 0.04% tyloxapol), and Sauton's minimal media, in the presence and absence of 500

953 ng/mL ATC. After 12 days, metabolite levels were obtained using high-resolution LC-MS. Colors

954 represent log<sub>2</sub>-fold change of Rv3722c-deficient (no ATC) versus -proficient (ATC) Rv3772-TetON. Data

955 are presented as mean ratio (n=3 vs n=3).

## 956 **References**

- 957 1. Ellens, K. W. *et al.* Confronting the catalytic dark matter encoded by sequenced genomes. *Nucleic*  
958 *Acids Res.* **45**, 11495–11514 (2017).
- 959 2. Galperin, M. Y. & Koonin, E. V. From complete genome sequence to ‘complete’ understanding?  
960 *Trends Biotechnol.* **28**, 398–406 (2010).
- 961 3. Niehaus, T. D., Thamm, A. M. K., Crécy-Lagard, V. de & Hanson, A. D. Proteins of Unknown  
962 Biochemical Function: A Persistent Problem and a Roadmap to Help Overcome It. *Plant Physiol.* **169**,  
963 1436–1442 (2015).
- 964 4. Hanson, A. D., Pribat, A., Waller, J. C. & de Crécy-Lagard, V. ‘Unknown’ proteins and ‘orphan’  
965 enzymes: the missing half of the engineering parts list--and how to find it. *Biochem. J.* **425**, 1–11  
966 (2009).
- 967 5. Chen, L. & Vitkup, D. Distribution of orphan metabolic activities. *Trends Biotechnol.* **25**, 343–348  
968 (2007).
- 969 6. WHO | Global tuberculosis report 2018. *WHO* Available at:  
970 [http://www.who.int/tb/publications/global\\_report/en/](http://www.who.int/tb/publications/global_report/en/). (Accessed: 9th August 2019)
- 971 7. Griffin, J. E. *et al.* High-resolution phenotypic profiling defines genes essential for mycobacterial  
972 growth and cholesterol catabolism. *PLoS Pathog.* **7**, e1002251 (2011).
- 973 8. Sassetti, C. M., Boyd, D. H. & Rubin, E. J. Genes required for mycobacterial growth defined by high  
974 density mutagenesis. *Mol. Microbiol.* **48**, 77–84 (2003).
- 975 9. El-Gebali, S. *et al.* The Pfam protein families database in 2019. *Nucleic Acids Res.* **47**, D427–D432  
976 (2019).
- 977 10. Mitchell, A. L. *et al.* InterPro in 2019: improving coverage, classification and access to protein  
978 sequence annotations. *Nucleic Acids Res.* **47**, D351–D360 (2019).

- 979 11. Huerta-Cepas, J. *et al.* eggNOG 4.5: a hierarchical orthology framework with improved functional  
980 annotations for eukaryotic, prokaryotic and viral sequences. *Nucleic Acids Res.* **44**, D286–D293  
981 (2016).
- 982 12. Yang, Z., Zeng, X. & Tsui, S. K.-W. Investigating function roles of hypothetical proteins encoded by  
983 the *Mycobacterium tuberculosis* H37Rv genome. *BMC Genomics* **20**, 394 (2019).
- 984 13. Ortega, C. *et al.* Systematic Survey of Serine Hydrolase Activity in *Mycobacterium tuberculosis*  
985 Defines Changes Associated with Persistence. *Cell Chem. Biol.* **23**, 290–298 (2016).
- 986 14. Målen, H., Berven, F. S., Fladmark, K. E. & Wiker, H. G. Comprehensive analysis of exported proteins  
987 from *Mycobacterium tuberculosis* H37Rv. *Proteomics* **7**, 1702–1718 (2007).
- 988 15. Penn, B. H. *et al.* An Mtb-Human Protein-Protein Interaction Map Identifies a Switch between Host  
989 Antiviral and Antibacterial Responses. *Mol. Cell* **71**, 637-648.e5 (2018).
- 990 16. Ehrt, S., Schnappinger, D. & Rhee, K. Y. Metabolic principles of persistence and pathogenicity in  
991 *Mycobacterium tuberculosis*. *Nat. Rev. Microbiol.* **16**, 496–507 (2018).
- 992 17. Gouzy, A., Poquet, Y. & Neyrolles, O. A central role for aspartate in *Mycobacterium tuberculosis*  
993 physiology and virulence. *Front. Cell. Infect. Microbiol.* **3**, 68 (2013).
- 994 18. Gouzy, A. *et al.* *Mycobacterium tuberculosis* nitrogen assimilation and host colonization require  
995 aspartate. *Nat. Chem. Biol.* **9**, 674–676 (2013).
- 996 19. Gouzy, A., Poquet, Y. & Neyrolles, O. Nitrogen metabolism in *Mycobacterium tuberculosis*  
997 physiology and virulence. *Nat. Rev. Microbiol.* **12**, 729–737 (2014).
- 998 20. Johnson, E. O. *et al.* Large-scale chemical–genetics yields new *M. tuberculosis* inhibitor classes.  
999 *Nature* **1** (2019). doi:10.1038/s41586-019-1315-z
- 1000 21. Kim, J.-H. *et al.* Protein inactivation in mycobacteria by controlled proteolysis and its application to  
1001 deplete the beta subunit of RNA polymerase. *Nucleic Acids Res.* **39**, 2210–2220 (2011).

- 1002 22. de Carvalho, L. P. S. *et al.* Activity-based metabolomic profiling of enzymatic function: identification  
1003 of Rv1248c as a mycobacterial 2-hydroxy-3-oxoadipate synthase. *Chem. Biol.* **17**, 323–332 (2010).
- 1004 23. Larrouy-Maumus, G. *et al.* Discovery of a glycerol 3-phosphate phosphatase reveals  
1005 glycerophospholipid polar head recycling in Mycobacterium tuberculosis. *Proc. Natl. Acad. Sci.* **110**,  
1006 11320–11325 (2013).
- 1007 24. Saito, N. *et al.* Metabolomics approach for enzyme discovery. *J. Proteome Res.* **5**, 1979–1987 (2006).
- 1008 25. Sévin, D. C., Fuhrer, T., Zamboni, N. & Sauer, U. Nontargeted in vitro metabolomics for high-  
1009 throughput identification of novel enzymes in Escherichia coli. *Nat. Methods* (2016).  
1010 doi:10.1038/nmeth.4103
- 1011 26. Shen, H. *et al.* The Human Knockout Gene CLYBL Connects Itaconate to Vitamin B12. *Cell* **171**, 771-  
1012 782.e11 (2017).
- 1013 27. Cooper, A. J. L. & Kuhara, T.  $\alpha$ -Ketoglutaramate: an overlooked metabolite of glutamine and a  
1014 biomarker for hepatic encephalopathy and inborn errors of the urea cycle. *Metab. Brain Dis.* **29**,  
1015 991–1006 (2014).
- 1016 28. Guidetti, P., Amori, L., Sapko, M. T., Okuno, E. & Schwarcz, R. Mitochondrial aspartate  
1017 aminotransferase: a third kynurenate-producing enzyme in the mammalian brain. *J. Neurochem.*  
1018 **102**, 103–111 (2007).
- 1019 29. Han, Q., Fang, J. & Li, J. Kynurenine aminotransferase and glutamine transaminase K of Escherichia  
1020 coli: identity with aspartate aminotransferase. *Biochem. J.* **360**, 617–623 (2001).
- 1021 30. Grishin, N. V., Phillips, M. A. & Goldsmith, E. J. Modeling of the spatial structure of eukaryotic  
1022 ornithine decarboxylases. *Protein Sci. Publ. Protein Soc.* **4**, 1291–1304 (1995).
- 1023 31. Sigrist, C. J. A. *et al.* New and continuing developments at PROSITE. *Nucleic Acids Res.* **41**, D344-347  
1024 (2013).

- 1025 32. Son, H. F. & Kim, K.-J. Structural Insights into a Novel Class of Aspartate Aminotransferase from  
1026 *Corynebacterium glutamicum*. *PLoS One* **11**, e0158402 (2016).
- 1027 33. Dolzan, M. *et al.* Crystal structure and reactivity of YbdL from *Escherichia coli* identify a methionine  
1028 aminotransferase function. *FEBS Lett.* **571**, 141–146 (2004).
- 1029 34. Mehta, P. K., Hale, T. I. & Christen, P. Aminotransferases: demonstration of homology and division  
1030 into evolutionary subgroups. *Eur. J. Biochem.* **214**, 549–561 (1993).
- 1031 35. Malashkevich, V. N., Onuffer, J. J., Kirsch, J. F. & Jansonius, J. N. Alternating arginine-modulated  
1032 substrate specificity in an engineered tyrosine aminotransferase. *Nat. Struct. Biol.* **2**, 548–553  
1033 (1995).
- 1034 36. Carroll, P., Pashley, C. A. & Parish, T. Functional analysis of GlnE, an essential adenylyl transferase in  
1035 *Mycobacterium tuberculosis*. *J. Bacteriol.* **190**, 4894–4902 (2008).
- 1036 37. Yuan, J. *et al.* Metabolomics-driven quantitative analysis of ammonia assimilation in *E. coli*. *Mol.*  
1037 *Syst. Biol.* **5**, 302 (2009).
- 1038 38. Catazaro, J., Caprez, A., Guru, A., Swanson, D. & Powers, R. Functional evolution of PLP-dependent  
1039 enzymes based on active-site structural similarities. *Proteins Struct. Funct. Bioinforma.* **82**, 2597–  
1040 2608 (2014).
- 1041 39. Muratore, K. E. *et al.* Molecular function prediction for a family exhibiting evolutionary tendencies  
1042 toward substrate specificity swapping: recurrence of tyrosine aminotransferase activity in the Ia  
1043 subfamily. *Proteins* **81**, 1593–1609 (2013).
- 1044 40. Onuffer, J. J. & Kirsch, J. F. Redesign of the substrate specificity of *Escherichia coli* aspartate  
1045 aminotransferase to that of *Escherichia coli* tyrosine aminotransferase by homology modeling and  
1046 site-directed mutagenesis. *Protein Sci.* **4**, 1750–1757 (1995).
- 1047 41. Cole, S. T. *et al.* Deciphering the biology of *Mycobacterium tuberculosis* from the complete genome  
1048 sequence. *Nature* **393**, 537–544 (1998).

- 1049 42. Amorim Franco, T. M., Hegde, S. & Blanchard, J. S. Chemical Mechanism of the Branched-Chain  
1050 Aminotransferase IlvE from *Mycobacterium tuberculosis*. *Biochemistry* **55**, 6295–6303 (2016).
- 1051 43. Bhor, V. M., Dev, S., Vasanthakumar, G. R. & Surolia, A. Spectral and kinetic characterization of 7,8-  
1052 diaminopelargonic acid synthase from *Mycobacterium tuberculosis*. *IUBMB Life* **58**, 225–233 (2006).
- 1053 44. Nasir, N., Anant, A., Vyas, R. & Biswal, B. K. Crystal structures of *Mycobacterium tuberculosis* HspAT  
1054 and ArAT reveal structural basis of their distinct substrate specificities. *Sci. Rep.* **6**, 18880 (2016).
- 1055 45. Holt, M. C. *et al.* Biochemical Characterization and Structure-Based Mutational Analysis Provide  
1056 Insight into the Binding and Mechanism of Action of Novel Aspartate Aminotransferase Inhibitors.  
1057 *Biochemistry* **57**, 6604–6614 (2018).
- 1058 46. Wrenger, C. *et al.* Specific inhibition of the aspartate aminotransferase of *Plasmodium falciparum*. *J.*  
1059 *Mol. Biol.* **405**, 956–971 (2011).
- 1060 47. Gouzy, A. *et al.* *Mycobacterium tuberculosis* exploits asparagine to assimilate nitrogen and resist  
1061 acid stress during infection. *PLoS Pathog.* **10**, e1003928 (2014).
- 1062 48. Tullius, M. V., Harth, G. & Horwitz, M. A. Glutamine synthetase GlnA1 is essential for growth of  
1063 *Mycobacterium tuberculosis* in human THP-1 macrophages and guinea pigs. *Infect. Immun.* **71**,  
1064 3927–3936 (2003).
- 1065 49. Agapova, A. *et al.* Flexible nitrogen utilisation by the metabolic generalist pathogen *Mycobacterium*  
1066 *tuberculosis*. *eLife* **8**, (2019).
- 1067 50. Jensen, R. A. & Calhoun, D. H. Intracellular roles of microbial aminotransferases: overlap enzymes  
1068 across different biochemical pathways. *Crit. Rev. Microbiol.* **8**, 229–266 (1981).
- 1069 51. Lal, P. B., Schneider, B. L., Vu, K. & Reitzer, L. The redundant aminotransferases in lysine and  
1070 arginine synthesis and the extent of aminotransferase redundancy in *Escherichia coli*. *Mol.*  
1071 *Microbiol.* **94**, 843–856 (2014).

- 1072 52. Gelfand, D. H. & Steinberg, R. A. Escherichia coli mutants deficient in the aspartate and aromatic  
1073 amino acid aminotransferases. *J. Bacteriol.* **130**, 429–440 (1977).
- 1074 53. Bennett, B. D. *et al.* Absolute metabolite concentrations and implied enzyme active site occupancy  
1075 in Escherichia coli. *Nat. Chem. Biol.* **5**, 593–599 (2009).
- 1076 54. Soga, T. *et al.* Quantitative metabolome analysis using capillary electrophoresis mass spectrometry.  
1077 *J. Proteome Res.* **2**, 488–494 (2003).
- 1078 55. Sugimoto, M. *et al.* MMMDB: Mouse Multiple Tissue Metabolome Database. *Nucleic Acids Res.* **40**,  
1079 D809-814 (2012).
- 1080 56. Reitzer, L. Nitrogen assimilation and global regulation in Escherichia coli. *Annu. Rev. Microbiol.* **57**,  
1081 155–176 (2003).
- 1082 57. Reitzer, L. Biosynthesis of Glutamate, Aspartate, Asparagine, L-Alanine, and D-Alanine. *EcoSal Plus* **1**,  
1083 (2004).
- 1084 58. Somashekar, B. S. *et al.* Metabolic Profiling of Lung Granuloma in Mycobacterium tuberculosis  
1085 Infected Guinea Pigs: Ex vivo 1H Magic Angle Spinning NMR Studies. *J. Proteome Res.* **10**, 4186–4195  
1086 (2011).
- 1087 59. Bhattacharyya, N. *et al.* An Aspartate-Specific Solute-Binding Protein Regulates Protein Kinase G  
1088 Activity To Control Glutamate Metabolism in Mycobacteria. *mBio* **9**, e00931-18 (2018).
- 1089 60. Rieck, B. *et al.* PknG senses amino acid availability to control metabolism and virulence of  
1090 Mycobacterium tuberculosis. *PLOS Pathog.* **13**, e1006399 (2017).
- 1091 61. Murphy, K. C., Papavinasundaram, K. & Sasseti, C. M. Mycobacterial recombineering. *Methods*  
1092 *Mol. Biol. Clifton NJ* **1285**, 177–199 (2015).
- 1093 62. Nandakumar, M., Prosser, G. A., Carvalho, L. P. S. de & Rhee, K. Metabolomics of Mycobacterium  
1094 tuberculosis. in *Mycobacteria Protocols* 105–115 (Humana Press, New York, NY, 2015).  
1095 doi:10.1007/978-1-4939-2450-9\_6

- 1096 63. Pesek, J. J., Matyska, M. T., Loo, J. A., Fischer, S. M. & Sana, T. R. Analysis of hydrophilic metabolites  
1097 in physiological fluids by HPLC-MS using a silica hydride-based stationary phase. *J. Sep. Sci.* **32**,  
1098 2200–2208 (2009).
- 1099 64. Pashley, C. A., Brown, A. C., Robertson, D. & Parish, T. Identification of the Mycobacterium  
1100 tuberculosis GlnE promoter and its response to nitrogen availability. *Microbiology* **152**, 2727–2734  
1101 (2006).
- 1102 65. Rial, D. V. & Ceccarelli, E. A. Removal of DnaK contamination during fusion protein purifications.  
1103 *Protein Expr. Purif.* **25**, 503–507 (2002).
- 1104 66. Jaisson, S., Veiga-da-Cunha, M. & Van Schaftingen, E. Molecular identification of omega-amidase,  
1105 the enzyme that is functionally coupled with glutamine transaminases, as the putative tumor  
1106 suppressor Nit2. *Biochimie* **91**, 1066–1071 (2009).
- 1107 67. Winn, M. D. *et al.* Overview of the CCP4 suite and current developments. *Acta Crystallogr. D Biol.*  
1108 *Crystallogr.* **67**, 235–242 (2011).
- 1109 68. Vagin, A. & Teplyakov, A. Molecular replacement with MOLREP. *Acta Crystallogr. D Biol. Crystallogr.*  
1110 **66**, 22–25 (2010).
- 1111 69. Kabsch, W. XDS. *Acta Crystallogr. D Biol. Crystallogr.* **66**, 125–132 (2010).
- 1112 70. Adams, P. D. *et al.* PHENIX: building new software for automated crystallographic structure  
1113 determination. *Acta Crystallogr. D Biol. Crystallogr.* **58**, 1948–1954 (2002).
- 1114 71. Emsley, P., Lohkamp, B., Scott, W. G. & Cowtan, K. Features and development of Coot. *Acta*  
1115 *Crystallogr. D Biol. Crystallogr.* **66**, 486–501 (2010).
- 1116 72. Liebschner, D. *et al.* Polder maps: improving OMIT maps by excluding bulk solvent. *Acta Crystallogr.*  
1117 *Sect. Struct. Biol.* **73**, 148–157 (2017).
- 1118 73. Pettersen, E. F. *et al.* UCSF Chimera—a visualization system for exploratory research and analysis. *J.*  
1119 *Comput. Chem.* **25**, 1605–1612 (2004).



- 1120 74. Mendler, K. *et al.* AnnoTree: visualization and exploration of a functionally annotated microbial tree  
1121 of life. *Nucleic Acids Res.* **47**, 4442–4448 (2019).
- 1122 75. Letunic, I. & Bork, P. Interactive Tree Of Life (iTOL) v4: recent updates and new developments.  
1123 *Nucleic Acids Res.* **47**, W256–W259 (2019).
- 1124 76. Zwart, P. H., Grosse-Kunstleve, R. W., Lebedev, A. A., Murshudov, G. N. & Adams, P. D. Surprises and  
1125 pitfalls arising from (pseudo)symmetry. *Acta Crystallogr. D Biol. Crystallogr.* **64**, 99–107 (2008).
- 1126 77. Brooks, C. L. *et al.* Pseudo-symmetry and twinning in crystals of homologous antibody Fv fragments.  
1127 *Acta Crystallogr. D Biol. Crystallogr.* **64**, 1250–1258 (2008).
- 1128 78. Gibrat, J. F., Madej, T. & Bryant, S. H. Surprising similarities in structure comparison. *Curr. Opin.*  
1129 *Struct. Biol.* **6**, 377–385 (1996).
- 1130 79. Mehta, P. K., Hale, T. I. & Christen, P. Aminotransferases: demonstration of homology and division  
1131 into evolutionary subgroups. *Eur. J. Biochem.* **214**, 549–561 (1993).
- 1132 80. Dolzan, M. *et al.* Crystal structure and reactivity of YbdL from Escherichia coli identify a methionine  
1133 aminotransferase function. *FEBS Lett.* **571**, 141–146 (2004).
- 1134
